# Supplementary material
Source: PubMed Central journal article supplement (PMC3761582)
Supplement: 1306579110_sapp.pdf [file 1306579110_sapp.pdf]

## **Supporting Information**

### **Experimental Procedures**

#### **SNP Markers screening and Individual Genotyping**

Based on the alignment result, we used SOAPSnp (15) to calculate the posterior probability of each genotype using a Bayesian formula and construct a consensus sequence of each parent by locating the allele type with the highest probability at each position. Homozygous genotypes that were different between two parents were treated as potential SNP markers if the following criteria were satisfied: sequencing depth  $\geq 4$  and  $\geq 50$ ; base quality  $\geq 25$ ; copy number  $< 2$ . Each RIL was genotyped at the potential SNP markers following two consecutive steps. We calculated the likelihood of genotypes of each RIL and then we allocated the allele type with the greatest likelihood back to each individual as the consensus genotype of each RIL.

To obtain a set of high-quality SNP markers and facilitate the following map construction, we filtered the candidate SNP markers based on several criteria including the ratio of heterozygous genotypes ( $\leq 0.5$ ), minor allele frequency ( $\geq 0.05$ ) and linkage relationships with adjacent markers. Markers outside the prediction interval were excluded for their abnormal linkage relationships.

#### **Graphic Genotyping Procedure**

In the graphic genotyping procedure, four primary steps were adopted as the window slides along each chromosome. 1) A window with a *93-11:PA64s* SNP ratio of 4:1 or higher was called *93-11* genotype, 1:4 or lower was called *PA64s* genotype. After that, we combined the adjacent bins with the same genotype into a block. 2) When the length of a block was shorter than 100 kb or the number of markers in a block was less than 20% of the markers in a window, the block was treated as a fragment. The fragments would be merged into adjacent blocks if both of the blocks were four times longer than the fragments. 3) The frequently transient genotypes of adjacent windows and successive small fragmented bins were merged into a heterozygous block in graphic genotypes when they satisfied the following conditions: the *93-11:PA64s* SNP ratio between 4:1 and 1:4, the total length of these fragments longer than 400 kb, and the number of markers in these fragments more than 80% of the markers in a window. Otherwise, the fragments were integrated into a block and genotyped based on the *93-11:PA64s* SNP ratio and adjacent block information. 4) The small blocks shorter than 400 kb were merged when both of the adjacent blocks have the same genotype. We then obtained a super-high resolution map of genome-wide graphic genotypes.

## Genome Annotation

For the protein-coding gene prediction, we first used Augustus-2.5.5 (37), GENSCAN (38), and Fgenesh (39) to *de novo* predict genes with parameters trained for monocots. Protein sequences from *Oryza sativa*, *Zea mays*, and *Sorghum bicolor* were used to perform homology-based prediction. Homologous genome sequences were aligned against the matched proteins using GeneWise (version 2.0) (40) for accurate spliced alignments. Finally, we merged these gene models into a unigene set using GLEAN (41) for each parental genome.

## Phenotyping and Correlation Analysis

Phenotypic analysis was conducted with two replications in the Hangzhou field from August to October, 2010, and in the Hainan field from March to June, 2011. Of 24 individuals of each RIL, *93-11*, *PA64s* and *LYP9*, 6 plants were randomly chosen for phenotyping. A total of 12 traits were evaluated. Among them, heading date (HD), plant height (PH), and effective tiller number (ETN) were measured directly in the field. The other 9 traits included spikelet number per panicle (SN), panicle length (PL), primary panicle branch number (PPB), secondary panicle branch number (SPB) and seed set (SS), 1000-grain weight (TGW), grain length (GL), grain width (GW), and yield per plant (PY) were measured in the laboratory following harvest.

HD was recorded as days from sowing to time when inflorescences had emerged above the flag leaf sheath for more than half of the individuals of line. PH was measured from the soil surface to the apex of the tallest panicle when panicles fully emerged. Effective tiller number was evaluated when grains were fully matured. The longest panicle was measured in length as PL. The total number of spikelet produced on the main tiller was counted. The panicle and grain related traits were measured in the laboratory. For the main panicles of an individual, PL was measured with ruler; PPB and SPB on the main tiller were counted manually. Grains were mixed and 10 grains were randomly sampled for phenotypic analysis. GL and GW were recorded at the maximal values for each grain using an electronic digital caliper. The TGW value was obtained by converting the weight of 200 grains. SS was counted as number of grains formed divided by the number of spikelet per panicle. Basic statistical analysis and correlation analysis were conducted with SAS 6.12 (SAS Institute).

## InDel/SNP Marker Development for Fine Mapping

Several InDel and SNP markers were developed for fine mapping of *qSN8* and *qSPB1*. Primers are shown in **SI Appendix. Table S18**. A high-resolution melting (HRM) analysis system for SNP genotyping was applied. PCR amplifications using LCGreen (Idaho Technology Inc.) were carried out in 10  $\mu$ L volumes containing 1  $\mu$ L rTaq (Takara-Bio, Dalian, China), 1  $\mu$ L 10 $\times$ PCR buffer, 1  $\mu$ L 10 $\times$  LCGreen Plus, 1  $\mu$ L

each 5  $\mu$ M primer, 2  $\mu$ L (100 Mm) of each dNTPs, 1  $\mu$ L (1.5 mM)  $MgCl_2$ , and 2  $\mu$ L (approximately 10 ng) template DNAs. PCR reactions were performed using 96 well PCR plates (ABgene), and the reactions were covered with 10  $\mu$ L mineral oil. PCR profile for rice DNA samples was one cycle of 95°C for 5 min, 30 cycles of 95°C for 30 s, 50-60°C for 30 s, and 72°C for 30 s, one cycle of 72°C for 10 min, one cycle 95°C for 30 s, and then down to 40°C holding at the 0.1°C/s. Subsequently, the PCR plates were subjected for HRM analysis in LightScanner (Idaho Technology Inc.).

### **RNA Extraction and Real-Time RCR Analysis**

Total RNA was isolated from panicles (for examining *GS3*, *DTH8*, *LAX1*), first internodes (for *EUII*, *NRL1*) in the booting stage, and tiller buds (for *HTDI*) at the tillering stage with the MicroRNA Extraction kit (Axygen). After RNase-free DNase (Promega) treatment, first-strand cDNAs were synthesized from equal amounts of total RNA with a ReverTra Ace® qPCR-RT kit (TOYOBA, Japan) according to procedures described by the manufacturer. Real-time PCR was performed using 2  $\times$  SYBR Green PCR Master Mix on a 7900HT Real-Time PCR System (Applied Biosystems) with three replicates for each sample. The relative expression level of each transcript was obtained by comparing to the expression of the *OsACTIN1* gene. Primers for candidate genes and *OsACTIN1* are listed in **SI Appendix. Table S19**.

### **Vector Construction and Transformation**

A 3.75-kb genomic DNA fragment of *DTH8* from *93-11* was amplified by PCR with primers DTH8F (5'-TAGAATTCGCAAGTGGTAAGGAAAGGTAGGAAC-3') and DTH8R (5'-ATGGATCCAATGTGCCAAGCCCAGATGAGCGTGAGCCG-3'), and cloned into pCAMBIA1300 after digestion with EcoR I and BamH I. The resultant plasmid, pCAMBIA1300-*DTH8* was introduced into *PA64s* by *Agrobacterium*-mediated transformation (42). The genotype of transgenic plants was determined by PCR amplification of the hygromycin phosphotransferase gene (*hpt*) with primers HPTF (5'-GGAGCATATACGCCCGGAGT-3') and HPTR (5'-GTTTATCGGCACTTTGCATCG-3') as well as selection for hygromycin resistance.

### **References for Experimental Procedures**

37. Stanke M, et al. (2006) Augustus: ab initio prediction of alternative transcripts. *Nucleic Acids Res* 34:W 435-W 439.
38. Burge C, Karlin S (1997) Prediction of complete gene structures in human genomic DNA. *J Mol Biol* 268(1):78-94.
39. Salamov AA, Solovyev VV (2000) Ab initio gene finding in Drosophila genomic DNA. *Genome Res* 10(4):516-522.

40. Birney E, Clamp M, Durbin R (2004) GeneWise and Genomewise. *Genome Res* 14(5):988-995.
41. Elvik CG, et al. (2007) Creating a honey bee consensus gene set. *Genome Biol* 8(1):R13.
42. Hiei Y, Ohta S, Komari T, Kumashiro T (1994) Efficient transformation of rice (*Oryza sativa* L.) mediated by *Agrobacterium* and sequence analysis of the boundaries of the T-DNA. *Plant J* 6(2):271-282.

## Supplementary Tables

- **Supplementary Table 1** Details of sequencing and mapping data of each *LYP9* RIL and parents.
- **Supplementary Table 2** SNP markers distribution along each chromosome.
- **Supplementary Table 3** Distribution of recombinant breakpoints in genic regions along each chromosome.
- **Supplementary Table 4** Gene density in hotspot regions and heterozygous regions containing hotspots.
- **Supplementary Table 5** SNP density in hotspot regions on 12 chromosomes.
- **Supplementary Table 6** Summary of nr-KOME cDNAs and mRNAs excised from *japonica* (IRGSP) with complete alignments in *93-11* and *PA64s* assemblies. Columns show the percentage of nr-KOME cDNAs and mRNAs that are covered  $\geq 95\%$  of the total length using BLAT.
- **Supplementary Table 7** Primers used to evaluate gap filling methods.
- **Supplementary Table 8** Primers used to evaluate single base error correction methods.
- **Supplementary Table 9** Summary of structural variations in three comparisons.
- **Supplementary Table 10** Summary of evidence for the GLEAN gene models.
- **Supplementary Table 11** Summary of predicted protein-coding genes of *PA64s*.
- **Supplementary Table 12** Functional annotation using different databases.
- **Supplementary Table 13** Summary of predicted protein-coding genes of *93-11*.
- **Supplementary Table 14.** Twelve traits of *93-11* and *PA64s* observed in Hangzhou (HZ) and Hainan (HN).
- **Supplementary Table 15** Correlation analysis of 12 yield-associated traits in Hangzhou (HZ).
- **Supplementary Table 16** Correlation analysis of 12 yield-associated traits in Hainan (HN).
- **Supplementary Table 17** Additive QTLs for twelve traits detected in RIL population derived from *93-11* and *PA64s* in Hainan and Hangzhou and reported QTLs or genes.
- **Supplementary Table 18** Primers of SNP and InDel markers for fine mapping.
- **Supplementary Table 19** Primers used for real time PCR of candidate genes.
- **Supplementary Table 20** Phenotype of T<sub>1</sub> plants transformed with pCAMBIA1300-*DTH8*.
- **Supplementary Table 21** Regions shared by QTLs and recombinant hotspots.

**Supplementary Table 1** Details of sequencing and mapping data of each *LYP9* RIL and parents.

| Sample ID    | Reads       |            |                   | Bases            |            |            |                |            |                      |
|--------------|-------------|------------|-------------------|------------------|------------|------------|----------------|------------|----------------------|
|              | Total Reads | Mapped (%) | Unique Mapped (%) | Total Bases (Mb) | Mapping    |            | Unique Mapping |            | Mis Match Bases (Mb) |
|              |             |            |                   |                  | Mapped (%) | Mean Depth | Mapped (%)     | Mean Depth |                      |
| <i>PA64s</i> | 301704550   | 87.11      | 69.24             | 22544            | 83.34      | 60.90      | 66.50          | 48.52      | 146                  |
| 9311         | 220731508   | 82.71      | 65.23             | 16598            | 79.72      | 45.07      | 63.02          | 35.63      | 142                  |
| BI10         | 13016758    | 77.05      | 60.69             | 976              | 75.75      | 1.99       | 59.65          | 1.56       | 6                    |
| BI100        | 37259138    | 74.36      | 59.23             | 3180             | 74.22      | 6.34       | 59.20          | 5.06       | 21                   |
| BI101        | 40644434    | 73.78      | 57.28             | 3478             | 73.60      | 6.88       | 57.19          | 5.35       | 25                   |
| BI109        | 44449918    | 73.16      | 57.10             | 3802             | 73.02      | 7.46       | 57.04          | 5.82       | 28                   |
| BI11         | 25047958    | 80.13      | 64.40             | 2068             | 79.42      | 4.42       | 63.86          | 3.55       | 13                   |
| BI112        | 39862786    | 73.97      | 57.96             | 3408             | 73.80      | 6.76       | 57.88          | 5.30       | 24                   |
| BI115        | 38938318    | 74.49      | 58.81             | 3329             | 74.34      | 6.64       | 58.76          | 5.25       | 23                   |
| BI116        | 37255504    | 73.23      | 57.70             | 3189             | 73.10      | 6.26       | 57.66          | 4.94       | 23                   |
| BI118        | 17001802    | 82.11      | 65.25             | 1275             | 80.85      | 2.77       | 64.24          | 2.20       | 7                    |
| BI119        | 14604564    | 79.34      | 61.87             | 1095             | 78.08      | 2.30       | 60.87          | 1.79       | 7                    |
| BI12         | 12884700    | 78.65      | 61.96             | 966              | 77.40      | 2.01       | 60.96          | 1.58       | 6                    |
| BI120        | 14092782    | 79.54      | 62.76             | 1057             | 78.30      | 2.22       | 61.77          | 1.75       | 7                    |
| BI121        | 14182188    | 78.48      | 62.79             | 1064             | 77.24      | 2.21       | 61.79          | 1.77       | 6                    |
| BI126        | 41132090    | 73.83      | 59.05             | 3522             | 73.71      | 6.97       | 59.01          | 5.58       | 24                   |
| BI127        | 31986464    | 73.82      | 58.29             | 2737             | 73.68      | 5.41       | 58.25          | 4.28       | 19                   |
| BI128        | 28512426    | 77.15      | 61.09             | 2383             | 76.39      | 4.89       | 60.53          | 3.88       | 16                   |
| BI132        | 22637472    | 77.64      | 62.08             | 1875             | 76.75      | 3.86       | 61.41          | 3.10       | 12                   |

|       |          |       |       |      |       |      |       |      |    |
|-------|----------|-------|-------|------|-------|------|-------|------|----|
| BI133 | 26332170 | 79.12 | 64.12 | 2198 | 78.28 | 4.62 | 63.48 | 3.75 | 14 |
| BI134 | 15615598 | 81.02 | 63.84 | 1171 | 79.77 | 2.51 | 62.85 | 1.98 | 7  |
| BI135 | 24964798 | 76.39 | 60.77 | 2058 | 75.44 | 4.17 | 60.05 | 3.32 | 14 |
| BI136 | 13178418 | 79.22 | 62.60 | 988  | 77.44 | 2.06 | 61.18 | 1.62 | 6  |
| BI138 | 15802226 | 79.73 | 62.99 | 1185 | 78.49 | 2.50 | 62.00 | 1.97 | 8  |
| BI139 | 13498744 | 82.33 | 65.87 | 1012 | 81.07 | 2.21 | 64.86 | 1.76 | 6  |
| BI140 | 13614306 | 79.18 | 62.08 | 1021 | 77.97 | 2.14 | 61.11 | 1.68 | 7  |
| BI142 | 13444750 | 76.95 | 60.40 | 1008 | 75.76 | 2.05 | 59.46 | 1.61 | 7  |
| BI143 | 25604752 | 79.16 | 62.62 | 2120 | 78.43 | 4.46 | 62.06 | 3.53 | 15 |
| BI147 | 31453138 | 73.44 | 57.90 | 2680 | 73.31 | 5.28 | 57.86 | 4.17 | 19 |
| BI148 | 25070888 | 77.59 | 60.97 | 2083 | 76.71 | 4.29 | 60.32 | 3.38 | 14 |
| BI15  | 13563284 | 78.93 | 62.31 | 1017 | 77.68 | 2.12 | 61.31 | 1.68 | 7  |
| BI150 | 12769698 | 78.91 | 61.64 | 958  | 77.13 | 1.98 | 60.24 | 1.55 | 6  |
| BI153 | 23077016 | 77.82 | 61.24 | 1946 | 77.07 | 4.03 | 60.70 | 3.18 | 12 |
| BI154 | 28863906 | 78.83 | 63.07 | 2407 | 77.98 | 5.04 | 62.44 | 4.04 | 16 |
| BI155 | 24128720 | 79.20 | 61.74 | 1991 | 78.47 | 4.20 | 61.20 | 3.27 | 13 |
| BI157 | 12899304 | 80.38 | 63.73 | 967  | 79.14 | 2.06 | 62.73 | 1.63 | 6  |
| BI16  | 12993492 | 80.47 | 64.69 | 975  | 79.2  | 2.07 | 63.65 | 1.67 | 6  |
| BI160 | 15116458 | 78.98 | 62.55 | 1134 | 77.74 | 2.37 | 61.55 | 1.87 | 7  |
| BI161 | 12897030 | 78.31 | 60.6  | 967  | 77.07 | 2.00 | 59.62 | 1.55 | 6  |
| BI162 | 12645306 | 79.98 | 63.19 | 948  | 78.74 | 2.01 | 62.20 | 1.58 | 6  |
| BI163 | 16357026 | 80.45 | 64.74 | 1227 | 79.21 | 2.61 | 63.73 | 2.10 | 7  |
| BI166 | 15204278 | 80.27 | 63.08 | 1140 | 79.03 | 2.42 | 62.10 | 1.90 | 7  |
| BI167 | 12928450 | 78.87 | 62.73 | 970  | 77.64 | 2.02 | 61.74 | 1.61 | 6  |
| BI168 | 13386300 | 79.92 | 63.25 | 1004 | 78.69 | 2.12 | 62.26 | 1.68 | 6  |
| BI170 | 25219392 | 77.73 | 61.50 | 2092 | 77.01 | 4.33 | 60.96 | 3.43 | 13 |

|       |          |       |       |      |       |      |       |      |    |
|-------|----------|-------|-------|------|-------|------|-------|------|----|
| BI172 | 27724940 | 71.67 | 55.91 | 2313 | 71.04 | 4.42 | 55.44 | 3.44 | 14 |
| BI174 | 26846748 | 80.22 | 64.44 | 2231 | 79.52 | 4.76 | 63.91 | 3.83 | 14 |
| BI177 | 15694798 | 80.72 | 63.62 | 1177 | 79.47 | 2.51 | 62.62 | 1.98 | 8  |
| BI178 | 13868504 | 80.16 | 62.55 | 1040 | 78.93 | 2.21 | 61.57 | 1.72 | 6  |
| BI18  | 12194036 | 72.96 | 56.65 | 915  | 71.77 | 1.76 | 55.71 | 1.37 | 6  |
| BI181 | 12917948 | 78.99 | 62.15 | 969  | 77.76 | 2.02 | 61.17 | 1.59 | 6  |
| BI185 | 14255186 | 79.16 | 63.06 | 1069 | 77.91 | 2.24 | 62.06 | 1.78 | 7  |
| BI186 | 14093314 | 80.13 | 63.76 | 1057 | 78.86 | 2.24 | 62.73 | 1.78 | 6  |
| BI19  | 14175900 | 77.47 | 60.77 | 1063 | 76.2  | 2.18 | 59.76 | 1.71 | 7  |
| BI190 | 21502118 | 78.01 | 61.14 | 1764 | 77.2  | 3.66 | 60.53 | 2.87 | 12 |
| BI191 | 13944856 | 77.84 | 61.16 | 1046 | 76.61 | 2.15 | 60.18 | 1.69 | 7  |
| BI192 | 22854924 | 76.84 | 60.93 | 1888 | 76.09 | 3.86 | 60.37 | 3.07 | 12 |
| BI194 | 14176730 | 78.21 | 60.02 | 1063 | 76.97 | 2.20 | 59.04 | 1.69 | 7  |
| BI195 | 12824140 | 80.65 | 65.05 | 962  | 79.38 | 2.05 | 64.01 | 1.65 | 6  |
| BI198 | 12687130 | 80.62 | 63.28 | 952  | 79.35 | 2.03 | 62.27 | 1.59 | 6  |
| BI199 | 12778530 | 76.80 | 60.07 | 958  | 75.57 | 1.95 | 59.09 | 1.52 | 6  |
| BI20  | 25795620 | 77.65 | 61.77 | 2175 | 77.09 | 4.50 | 61.37 | 3.59 | 15 |
| BI203 | 24508406 | 78.27 | 61.72 | 2041 | 77.47 | 4.24 | 61.12 | 3.36 | 14 |
| BI204 | 11762464 | 80.42 | 62.37 | 882  | 79.16 | 1.88 | 61.37 | 1.45 | 5  |
| BI205 | 12931942 | 79.63 | 60.39 | 970  | 78.37 | 2.04 | 59.42 | 1.55 | 6  |
| BI208 | 33550868 | 71.98 | 56.19 | 2871 | 72.01 | 5.56 | 56.28 | 4.34 | 20 |
| BI209 | 42643806 | 73.76 | 58.94 | 3648 | 73.81 | 7.23 | 59.07 | 5.79 | 23 |
| BI22  | 14240586 | 77.77 | 60.73 | 1068 | 76.5  | 2.19 | 59.72 | 1.71 | 7  |
| BI221 | 27556376 | 75.44 | 58.37 | 2067 | 74.23 | 4.12 | 57.42 | 3.19 | 16 |
| BI223 | 38012712 | 74.61 | 59.28 | 3252 | 74.64 | 6.52 | 59.38 | 5.19 | 21 |
| BI225 | 35969372 | 73.83 | 58.99 | 3076 | 73.87 | 6.10 | 59.10 | 4.88 | 20 |



|       |          |       |       |      |       |      |       |      |    |
|-------|----------|-------|-------|------|-------|------|-------|------|----|
| BI227 | 26887742 | 79.09 | 62.86 | 2242 | 78.37 | 4.73 | 62.33 | 3.75 | 15 |
| BI228 | 26539070 | 79.96 | 63.72 | 2205 | 79.24 | 4.69 | 63.18 | 3.74 | 14 |
| BI232 | 13010504 | 80.30 | 62.70 | 976  | 79.07 | 2.07 | 61.73 | 1.62 | 7  |
| BI235 | 13098332 | 79.46 | 62.65 | 982  | 78.24 | 2.06 | 61.68 | 1.63 | 7  |
| BI236 | 24809760 | 77.86 | 61.53 | 2053 | 77.14 | 4.25 | 61.00 | 3.36 | 14 |
| BI238 | 15037220 | 80.77 | 63.98 | 1128 | 79.51 | 2.41 | 62.97 | 1.91 | 7  |
| BI239 | 12947670 | 79.07 | 61.26 | 971  | 77.84 | 2.03 | 60.30 | 1.57 | 6  |
| BI24  | 13452724 | 78.64 | 62.55 | 1009 | 77.38 | 2.10 | 61.54 | 1.67 | 7  |
| BI241 | 11718342 | 78.63 | 60.17 | 879  | 77.4  | 1.83 | 59.22 | 1.40 | 6  |
| BI246 | 12949396 | 79.49 | 61.86 | 971  | 78.26 | 2.04 | 60.89 | 1.59 | 6  |
| BI248 | 27492264 | 81.28 | 65.75 | 2290 | 80.61 | 4.96 | 65.25 | 4.01 | 13 |
| BI25  | 13587052 | 79.75 | 63.32 | 1019 | 78.49 | 2.15 | 62.30 | 1.71 | 6  |
| BI251 | 13832110 | 78.22 | 58.86 | 1037 | 76.99 | 2.15 | 57.92 | 1.61 | 7  |
| BI253 | 25726472 | 77.86 | 60.95 | 2129 | 77.16 | 4.42 | 60.44 | 3.45 | 14 |
| BI255 | 26289704 | 79.70 | 63.16 | 2179 | 79.00 | 4.63 | 62.65 | 3.67 | 13 |
| BI259 | 14356232 | 80.27 | 63.63 | 1077 | 79.02 | 2.29 | 62.63 | 1.81 | 7  |
| BI264 | 12649454 | 81.10 | 63.98 | 949  | 79.85 | 2.04 | 62.98 | 1.61 | 6  |
| BI265 | 14438326 | 81.31 | 64.40 | 1083 | 80.05 | 2.33 | 63.39 | 1.84 | 7  |
| BI267 | 12641606 | 79.60 | 62.82 | 948  | 78.36 | 2.00 | 61.83 | 1.57 | 6  |
| BI269 | 28695680 | 78.88 | 61.92 | 2392 | 78.08 | 5.01 | 61.33 | 3.94 | 16 |
| BI271 | 13890146 | 80.11 | 63.01 | 1042 | 78.87 | 2.21 | 62.03 | 1.74 | 7  |
| BI274 | 13500226 | 83.28 | 66.11 | 1013 | 82.01 | 2.23 | 65.09 | 1.77 | 5  |
| BI277 | 11706286 | 77.89 | 60.15 | 878  | 76.67 | 1.81 | 59.20 | 1.40 | 6  |
| BI283 | 18160614 | 79.89 | 61.39 | 1362 | 78.65 | 2.88 | 60.42 | 2.21 | 9  |
| BI29  | 14396060 | 75.92 | 59.83 | 1080 | 74.70 | 2.17 | 58.86 | 1.71 | 7  |
| BI30  | 14031800 | 78.55 | 60.70 | 1052 | 77.30 | 2.19 | 59.72 | 1.69 | 7  |

|      |          |       |       |      |       |      |       |      |    |
|------|----------|-------|-------|------|-------|------|-------|------|----|
| BI31 | 34163250 | 78.47 | 62.17 | 3007 | 78.15 | 6.32 | 61.91 | 5.00 | 20 |
| BI32 | 22470064 | 80.95 | 65.79 | 1845 | 80.17 | 3.97 | 65.19 | 3.23 | 11 |
| BI34 | 39832006 | 77.25 | 59.35 | 2987 | 76.02 | 6.10 | 58.40 | 4.69 | 21 |
| BI35 | 16258484 | 78.05 | 60.08 | 1219 | 76.83 | 2.52 | 59.12 | 1.94 | 8  |
| BI36 | 39997366 | 78.65 | 62.50 | 3504 | 78.29 | 7.37 | 62.21 | 5.86 | 23 |
| BI37 | 35938198 | 78.71 | 63.55 | 3144 | 78.35 | 6.61 | 63.27 | 5.34 | 21 |
| BI38 | 27901060 | 78.49 | 61.74 | 2345 | 77.85 | 4.90 | 61.26 | 3.86 | 16 |
| BI40 | 12689014 | 80.83 | 64.83 | 952  | 79.57 | 2.03 | 63.81 | 1.63 | 6  |
| BI41 | 27078076 | 78.77 | 63.05 | 2290 | 78.13 | 4.81 | 62.57 | 3.84 | 16 |
| BI45 | 35744108 | 73.64 | 57.94 | 3056 | 73.39 | 6.03 | 57.81 | 4.74 | 22 |
| BI47 | 37719676 | 73.54 | 58.26 | 3224 | 73.31 | 6.35 | 58.15 | 5.04 | 23 |
| BI49 | 39172252 | 75.26 | 60.78 | 3347 | 75.02 | 6.75 | 60.65 | 5.45 | 24 |
| BI5  | 13862524 | 78.01 | 59.85 | 1040 | 76.70 | 2.14 | 58.82 | 1.64 | 7  |
| BI50 | 39904574 | 75.99 | 60.84 | 3409 | 75.75 | 6.93 | 60.72 | 5.56 | 22 |
| BI51 | 13942982 | 80.37 | 63.86 | 1046 | 79.11 | 2.22 | 62.85 | 1.77 | 7  |
| BI54 | 36957984 | 73.26 | 58.35 | 3160 | 73.34 | 6.23 | 58.52 | 4.97 | 21 |
| BI59 | 38713958 | 72.12 | 57.42 | 3308 | 72.21 | 6.42 | 57.60 | 5.12 | 22 |
| BI60 | 14364762 | 79.51 | 62.08 | 1077 | 78.28 | 2.27 | 61.10 | 1.77 | 7  |
| BI61 | 12378582 | 80.19 | 63.91 | 928  | 78.93 | 1.97 | 62.89 | 1.57 | 6  |
| BI62 | 16593298 | 79.98 | 62.99 | 1244 | 78.74 | 2.63 | 62.00 | 2.07 | 8  |
| BI67 | 37833922 | 70.21 | 55.62 | 3233 | 70.28 | 6.11 | 55.78 | 4.85 | 22 |
| BI68 | 24811340 | 76.85 | 60.48 | 2049 | 76.14 | 4.19 | 59.95 | 3.30 | 14 |
| BI71 | 38993296 | 71.50 | 56.53 | 3330 | 71.61 | 6.41 | 56.71 | 5.07 | 24 |
| BI74 | 35034872 | 75.01 | 59.48 | 2992 | 74.90 | 6.02 | 59.48 | 4.78 | 20 |
| BI8  | 13487016 | 79.62 | 62.05 | 1012 | 78.38 | 2.13 | 61.07 | 1.66 | 7  |
| BI83 | 29364700 | 76.03 | 60.03 | 2202 | 74.81 | 4.43 | 59.06 | 3.49 | 16 |

|      |          |       |       |      |       |      |       |      |    |
|------|----------|-------|-------|------|-------|------|-------|------|----|
| BI84 | 35887702 | 74.31 | 59.48 | 3063 | 74.21 | 6.11 | 59.47 | 4.90 | 22 |
| BI89 | 38084532 | 72.50 | 57.63 | 3244 | 72.39 | 6.31 | 57.62 | 5.02 | 23 |
| BI9  | 14999770 | 79.15 | 63.04 | 1125 | 77.83 | 2.35 | 61.96 | 1.87 | 7  |
| BI90 | 12126842 | 81.77 | 66.22 | 910  | 80.51 | 1.97 | 65.19 | 1.59 | 5  |
| BI92 | 34545320 | 72.68 | 57.78 | 2947 | 72.52 | 5.74 | 57.72 | 4.57 | 21 |
| BI94 | 39371378 | 74.56 | 59.01 | 3358 | 74.42 | 6.71 | 58.97 | 5.32 | 23 |
| BI95 | 13019820 | 78.58 | 61.65 | 976  | 77.32 | 2.03 | 60.65 | 1.59 | 6  |
| BI97 | 13223270 | 76.19 | 58.94 | 992  | 74.46 | 1.98 | 57.60 | 1.53 | 7  |
| BI98 | 17594250 | 79.84 | 62.35 | 1320 | 78.60 | 2.79 | 61.37 | 2.18 | 8  |

---

**Supplementary Table 2** SNP markers distribution along each chromosome.

| Chr. | Markers Distribution |       |        |       |        | Genes  |         |
|------|----------------------|-------|--------|-------|--------|--------|---------|
|      | Total                | CDS   | 5' UTR | Gene  | 3' UTR | Number | Covered |
| 1    | 20473                | 2367  | 349    | 7426  | 746    | 6714   | 1921    |
| 2    | 14608                | 1407  | 251    | 5171  | 550    | 5555   | 1467    |
| 3    | 12417                | 1224  | 283    | 4432  | 492    | 5693   | 1390    |
| 4    | 20305                | 2480  | 362    | 7449  | 627    | 5514   | 1597    |
| 5    | 11211                | 1122  | 218    | 3785  | 451    | 4704   | 1232    |
| 6    | 12480                | 1291  | 180    | 4245  | 428    | 4869   | 1327    |
| 7    | 21781                | 2164  | 361    | 7204  | 706    | 4600   | 1793    |
| 8    | 8217                 | 783   | 140    | 2774  | 315    | 4327   | 861     |
| 9    | 10781                | 1123  | 148    | 3587  | 299    | 3513   | 931     |
| 10   | 13810                | 1718  | 190    | 4930  | 433    | 3672   | 1191    |
| 11   | 6691                 | 1097  | 116    | 2614  | 214    | 4305   | 683     |
| 12   | 19073                | 2144  | 233    | 6266  | 649    | 4158   | 1264    |
| All  | 171847               | 18920 | 2831   | 59883 | 5910   | 57624  | 15657   |

**Supplementary Table 3** Distribution of recombinant breakpoints in genic regions along each chromosome.

| Chr.  | Breakpoints | Recombinants | Gene | 5' UTR | CDS | 3' UTR |
|-------|-------------|--------------|------|--------|-----|--------|
| 1     | 393         | 845          | 139  | 7      | 52  | 12     |
| 2     | 408         | 814          | 130  | 8      | 27  | 21     |
| 3     | 336         | 670          | 122  | 11     | 36  | 18     |
| 4     | 379         | 678          | 125  | 10     | 40  | 17     |
| 5     | 299         | 611          | 91   | 5      | 29  | 21     |
| 6     | 244         | 463          | 86   | 5      | 25  | 13     |
| 7     | 263         | 369          | 96   | 8      | 33  | 11     |
| 8     | 264         | 612          | 74   | 3      | 20  | 10     |
| 9     | 209         | 365          | 59   | 6      | 14  | 5      |
| 10    | 259         | 529          | 82   | 82     | 27  | 5      |
| 11    | 175         | 412          | 69   | 1      | 33  | 7      |
| 12    | 295         | 562          | 88   | 3      | 32  | 10     |
| Total | 3524        | 6930         | 1161 | 149    | 368 | 150    |

**Supplementary Table 4** Gene density in hotspot regions and heterozygous regions containing hotspots.

|                          | Hots pot number | Hots pot contain gene | Gene loci number | Gene density (/kb) | Heterozygous region | Heterozygous region containing hot spot | Percent of Heterozygous regions with hot spots |
|--------------------------|-----------------|-----------------------|------------------|--------------------|---------------------|-----------------------------------------|------------------------------------------------|
| Chr1                     | 52              | 27                    | 27               | 0.260              | 94                  | 71                                      | 0.755                                          |
| Chr2                     | 32              | 18                    | 20               | 0.313              | 121                 | 70                                      | 0.578                                          |
| Chr3                     | 38              | 27                    | 30               | 0.395              | 32                  | 29                                      | 0.906                                          |
| Chr4                     | 38              | 23                    | 25               | 0.329              | 120                 | 99                                      | 0.825                                          |
| Chr5                     | 36              | 27                    | 31               | 0.431              | 57                  | 42                                      | 0.736                                          |
| Chr6                     | 26              | 17                    | 19               | 0.365              | 13                  | 10                                      | 0.769                                          |
| Chr7                     | 36              | 21                    | 21               | 0.292              | 29                  | 13                                      | 0.448                                          |
| Chr8                     | 26              | 15                    | 16               | 0.308              | 44                  | 34                                      | 0.772                                          |
| Chr9                     | 25              | 16                    | 17               | 0.340              | 27                  | 19                                      | 0.703                                          |
| Chr10                    | 24              | 14                    | 14               | 0.292              | 81                  | 62                                      | 0.765                                          |
| Chr11                    | 24              | 19                    | 22               | 0.458              | 31                  | 24                                      | 0.774                                          |
| Chr12                    | 29              | 11                    | 11               | 0.190              | 139                 | 116                                     | 0.834                                          |
| Total                    | 386             | 224                   | 253              | 0.328              | 788                 | 589                                     | 0.747                                          |
| <i>Nipponbare</i> genome |                 | 370020kb              | 55986            | 0.151              |                     |                                         |                                                |

**Note:** Gene density was calculated by the ratio of gene loci number to the length of the related regions. Every hotspot is 2 kb in length. The total length of the hotspot regions of one chromosome is calculated by hotspot number  $\times$  2 kb. The *Nipponbare* gene density is calculated according to the TIGR database.

**Supplementary Table 5** SNP density in hotspot regions on 12 chromosomes.

| <b>Chrs</b> | <b>SNPs in<br/>Hot spots</b> | <b>SNPs in<br/>chromosome</b> | <b>Chromosome<br/>length (k b)</b> | <b>SNP density in<br/>Hot spots(/kb)</b> | <b>SNP density in<br/>chromosome(/k b)</b> |
|-------------|------------------------------|-------------------------------|------------------------------------|------------------------------------------|--------------------------------------------|
| Chr01       | 279                          | 46656                         | 43,268.88                          | 2.68                                     | 1.08                                       |
| Chr02       | 135                          | 27995                         | 35,930.38                          | 2.11                                     | 0.78                                       |
| Chr03       | 213                          | 27930                         | 36,406.69                          | 2.80                                     | 0.77                                       |
| Chr04       | 250                          | 45091                         | 35,278.23                          | 3.29                                     | 1.28                                       |
| Chr05       | 157                          | 24239                         | 29,894.79                          | 2.18                                     | 0.81                                       |
| Chr06       | 122                          | 30293                         | 31,246.79                          | 2.35                                     | 0.97                                       |
| Chr07       | 187                          | 50519                         | 29,696.63                          | 2.60                                     | 1.70                                       |
| Chr08       | 127                          | 15658                         | 28,439.31                          | 2.44                                     | 0.55                                       |
| Chr09       | 107                          | 24735                         | 23,011.24                          | 2.14                                     | 1.07                                       |
| Chr10       | 169                          | 28540                         | 23,134.76                          | 3.52                                     | 1.23                                       |
| Chr11       | 138                          | 13139                         | 28,512.67                          | 2.88                                     | 0.46                                       |
| Chr12       | 254                          | 40114                         | 27,497.21                          | 4.38                                     | 1.46                                       |
| Total       | 2138                         | 374909                        | 372,317.57                         | 2.77                                     | 1.01                                       |

**Note:** Every hotspot is 2 kb in length.

**Supplementary Table 6** Summary of nr-KOME cDNAs and mRNAs excised from *japonica* (IRGSP) with complete alignments in *93-11* and *PA64s* assemblies. Columns show the percentage of nr-KOME cDNAs and mRNAs that are covered  $\geq 95\%$  of the total length using BLAST.

| Assembly                 | Total (%) | 95% Covered in Genome (%) |       | 95% Covered in Chromosomes (%) |       | 95% Covered in Scaffolds (%) |      | Total |
|--------------------------|-----------|---------------------------|-------|--------------------------------|-------|------------------------------|------|-------|
|                          | Found     | All                       | Uniq  | All                            | Uniq  | All                          | Uniq |       |
| nr-KOME vs. <i>93-11</i> | 94.55     | 85.60                     | 76.00 | 85.35                          | 75.91 | 1.03                         | 0.67 | 26278 |
| nr-KOME vs. <i>PA64s</i> | 93.92     | 82.90                     | 75.82 | 82.81                          | 75.79 | 0.40                         | 0.23 | 26278 |
| mRNAs vs. <i>93-11</i>   | 99.55     | 94.29                     | 81.37 | 94.00                          | 81.33 | 1.15                         | 0.83 | 29389 |
| mRNAs vs. <i>PA64s</i>   | 98.96     | 91.29                     | 81.55 | 91.20                          | 81.56 | 0.41                         | 0.35 | 29389 |

**Supplementary Table 7** Primers used to evaluate gap filling methods.

| Chr. | ID       | Types | Direction | Primes                        | Product length (bp) | TM Value (°C) |
|------|----------|-------|-----------|-------------------------------|---------------------|---------------|
| 01   | C7264659 | B     | F         | 5'-CATGTCGTCGCTAAACCA-3'      | 457                 | 52.7          |
|      |          |       | R         | 5'-CGCCTCCACAGTAAATCC-3'      | 457                 | 53.2          |
| 01   | C7276243 | B     | F         | 5'-AGGCA CGA GGT TATTGAG-3'   | 468                 | 50.2          |
|      |          |       | R         | 5'-GGTTCTTA GCTGGGCA CT-3'    | 468                 | 52.1          |
| 01   | C7280601 | A     | F         | 5'-TTGGA GACTGAAAACGAA G-3'   | 462                 | 50.5          |
|      |          |       | R         | 5'-ATTTGAGCTGGT GAAA GTG-3'   | 462                 | 50.3          |
| 01   | C7295595 | C     | F         | 5'-AGAGGATGGCAA CAA GCG-3'    | 479                 | 56.4          |
|      |          |       | R         | 5'-ACCTGTCA GCCCATCTCA -3'    | 479                 | 53.0          |
| 01   | C7298599 | A     | F         | 5'-ATGATGCGGGTTGGTAGC-3'      | 459                 | 56.2          |
|      |          |       | R         | 5'-GGGGCAA GTCAA GTAA GTC-3'  | 459                 | 51.7          |
| 01   | C7307443 | C     | F         | 5'-CGATTTTCA GTCCTACAGAGT-3'  | 548                 | 51.3          |
|      |          |       | R         | 5'-CCTGTCTTATGAGGTGCTTT-3'    | 548                 | 51.9          |
| 01   | C7309097 | C     | F         | 5'-AGCTGGATATGGACAACTGA-3'    | 408                 | 52.5          |
|      |          |       | R         | 5'-GGAA CCGCTTCTGGATTT-3'     | 408                 | 54.6          |
| 01   | C7314353 | A     | F         | 5'-GCA CGAATCTTAAAGCAATC-3'   | 425                 | 53.0          |
|      |          |       | R         | 5'-TTCCGTCCTTCCACCTCT-3'      | 425                 | 54.5          |
| 02   | C7182779 | B     | F         | 5'-GGCTGAACATGCTCTATTG-3'     | 422                 | 50.9          |
|      |          |       | R         | 5'-GGTTA GGT TTA GGGTTGTCT-3' | 422                 | 50.4          |
| 02   | C7198337 | B     | F         | 5'-ACTGCGGTGACAGGTGGAA-3'     | 474                 | 59.0          |
|      |          |       | R         | 5'-TTAGGACGGA GGGAGTAGGC-3'   | 474                 | 58.5          |
| 02   | C7219941 | C     | F         | 5'-AAGCGGCTTCCCTCTACT-3'      | 486                 | 58.2          |
|      |          |       | R         | 5'-ATCTGCCCTCCTGTCGTT-3'      | 486                 | 59.0          |



|    |          |   |   |                              |     |      |
|----|----------|---|---|------------------------------|-----|------|
| 02 | C7261389 | A | F | 5'-GGAA GCAAAACAGCA CGAA-3'  | 445 | 57.0 |
|    |          |   | R | 5'-TCATCCCCCTCCCCAACAT-3'    | 445 | 57.5 |
| 03 | C7254331 | A | F | 5'-TCATTCCCCTTGT CGTGC-3'    | 423 | 56.7 |
|    |          |   | R | 5'-CAA GCCGTCA GGTCTCAA-3'   | 423 | 54.3 |
| 03 | C7291631 | C | F | 5'-TGCAA GAGGCTTAATACGG-3'   | 499 | 54.1 |
|    |          |   | R | 5'-AGGGCACTTGACTGACCGA-3'    | 499 | 58.3 |
| 04 | C7207755 | A | F | 5'-GAAAATAACGCTCGGTAGA-3'    | 475 | 50.7 |
|    |          |   | R | 5'-AGAGGGTTAGTGTAAGTGGG-3'   | 475 | 50.9 |
| 04 | C7245175 | B | F | 5'-ACGGCACGAA GAGGAATG-3'    | 405 | 56.2 |
|    |          |   | R | 5'-TCGGATGCTTGTGGGAT-3'      | 405 | 56.4 |
| 04 | C7248103 | C | F | 5'-AAAGGTGGCTAAAAGTGGA-3'    | 447 | 52.4 |
|    |          |   | R | 5'-TAGGGAAA GTGGCATCAA-3'    | 447 | 51.4 |
| 04 | C7279271 | C | F | 5'-GACCAAAGATGGC GAGTA-3'    | 452 | 50.8 |
|    |          |   | R | 5'-AGGGTCGGTATGATTGTG-3'     | 452 | 50.2 |
| 05 | C7223687 | C | F | 5'-GAAACTATGCGATGCTATGC-3'   | 444 | 53.7 |
|    |          |   | R | 5'-AAA ACTGAGAA GCCACGA-3'   | 444 | 50.6 |
| 05 | C7227091 | C | F | 5'-GGGAAATCGTGAAATCGT-3'     | 403 | 52.5 |
|    |          |   | R | 5'-CAAAA GGTCAATGGCAAAC-3'   | 403 | 53.7 |
| 05 | C7235105 | A | F | 5'-CGGTTTGGGGA GATAGAG-3'    | 435 | 52.3 |
|    |          |   | R | 5'-CATA GGGAA GAAA GCGATA-3' | 435 | 50.5 |
| 06 | C7211853 | B | F | 5'-AACTTGTA GCCTATGCCTTGT-3' | 440 | 53.9 |
|    |          |   | R | 5'-TACCCATCCGCA CCTTTC-3'    | 440 | 56.1 |
| 06 | C7218799 | B | F | 5'-AGAGGAGCCAATAACCAAA-3'    | 429 | 52.2 |
|    |          |   | R | 5'-CAAGCTAACCAACCAAGT-3'     | 429 | 50.2 |
| 06 | C7234203 | C | F | 5'-CTGTTCCATGCCCTCGTCT-3'    | 471 | 57.9 |
|    |          |   | R | 5'-TCTATTTTATCTCCCCAAGC-3'   | 471 | 51.7 |

|    |          |   |   |                               |     |      |
|----|----------|---|---|-------------------------------|-----|------|
| 06 | C7247971 | A | F | 5'-ATGGA CTCCCA CAGGTTAT-3'   | 499 | 50.9 |
|    |          |   | R | 5'-TGTGGTAATGCAACTCCTC-3'     | 499 | 50.8 |
| 07 | C7167625 | B | F | 5'-ACCTCTGGTTTCGCAATG-3'      | 482 | 53.5 |
|    |          |   | R | 5'-GCAACTTCA GCCTATTCTATCT-3' | 482 | 53.2 |
| 07 | C7212223 | C | F | 5'-CA GGTCCCTTCCAAATGT-3'     | 498 | 52.2 |
|    |          |   | R | 5'-TGTTTAGTTCCCTCCGTTT-3'     | 498 | 52.2 |
| 07 | C7213359 | A | F | 5'-AAATCATA GCCA GA CCA CA-3' | 445 | 50.5 |
|    |          |   | R | 5'-GATA CCATTCAACGA CAACA-3'  | 445 | 51.0 |
| 07 | C7238465 | B | F | 5'-TGA CGCATA CGA CTA CGG-3'  | 489 | 52.8 |
|    |          |   | R | 5'-GGTTGTTCCACCTTGAC-3'       | 489 | 52.2 |
| 07 | C7250609 | C | F | 5'-GGTTTCTTTGCTTGATGG-3'      | 448 | 50.6 |
|    |          |   | R | 5'-ACTAAATTGGTGTCTGGGA-3'     | 448 | 50.5 |
| 07 | C7270079 | C | F | 5'-TTTCCA GCATCACTATCA CA-3'  | 404 | 51.6 |
|    |          |   | R | 5'-AAGCCTTCAGCTAGGCC-3'       | 404 | 51.9 |
| 08 | C7268071 | B | F | 5'-ACTGGTAA GTGGGCATTG-3'     | 495 | 50.6 |
|    |          |   | R | 5'-CTTTGTTCCCTTCTGTTC-3'      | 495 | 51.7 |
| 08 | C7299327 | B | F | 5'-TGA GCGGCA GTGGTAA GT-3'   | 478 | 54.2 |
|    |          |   | R | 5'-CA GAAATCGGA GGCAA GA-3'   | 478 | 53.8 |
| 08 | C7310585 | C | F | 5'-CA GA TCA GTCGAAAACGG-3'   | 461 | 51.2 |
|    |          |   | R | 5'-TCCAA GTCCCA GAAATACC-3'   | 461 | 51.9 |
| 08 | C7321337 | C | F | 5'-GTTTTGCCTCGTAGACCG-3'      | 479 | 53.6 |
|    |          |   | R | 5'-CTCCGTGACTGAGTAATGAAGA-3'  | 479 | 54.6 |
| 09 | C7198411 | A | F | 5'-CATTTGGCAATA GGA GGT-3'    | 403 | 50.2 |
|    |          |   | R | 5'-TGACTGGATGTTGGAA GG-3'     | 403 | 50.8 |
| 09 | C7206849 | C | F | 5'-TTTGGACGGA GGGAGTAT-3'     | 468 | 52.1 |
|    |          |   | R | 5'-ACGAAAA GCGA CCGA GGA-3'   | 468 | 58.7 |

|    |          |   |   |                                |     |      |
|----|----------|---|---|--------------------------------|-----|------|
| 09 | C7224685 | C | F | 5'-GA GGTGGATGGA GGATGA-3'     | 419 | 52.2 |
|    |          |   | R | 5'-AAGGA GCGA GGA GAA GAA-3'   | 419 | 51.8 |
| 09 | C7249941 | C | F | 5'-AATGGAA GCAAATGAA GGAG-3'   | 419 | 54.5 |
|    |          |   | R | 5'-CGGCTAATACCCCAATACAG-3'     | 419 | 55.3 |
| 10 | C7243181 | B | F | 5'-GA GGC GGGTA GTGA GAA CA-3' | 506 | 55.5 |
|    |          |   | R | 5'-TGCGATGCGAA GCTGAAA-3'      | 506 | 59.2 |
| 10 | C7243877 | B | F | 5'-CGAAGGATAAAA GTGGGA-3'      | 466 | 50.4 |
|    |          |   | R | 5'-CGGTGCTTGA CCTGA GAA-3'     | 466 | 54.3 |
| 11 | C7314909 | C | F | 5'-GTTA GTGGACCAAATGCG-3'      | 530 | 51.4 |
|    |          |   | R | 5'-TGCTTACCTTGGAAATCGT-3'      | 530 | 50.7 |
| 12 | C7134351 | C | F | 5'-ATTCCATA CTCATCA GACATCG-3' | 489 | 54.2 |
|    |          |   | R | 5'-CCTGGTATCTGGTTTTGC-3'       | 489 | 50.5 |
| 12 | C7150330 | B | F | 5'-GCCGGTAGGATTTCA CTC-3'      | 465 | 52.2 |
|    |          |   | R | 5'-CCCGAAGAACATCAACAC-3'       | 465 | 50.6 |
| 12 | C7202949 | C | F | 5'-AAAGGCTACATA GGTTCTGTG-3'   | 406 | 52.4 |
|    |          |   | R | 5'-AAGCAA GTGGATGGGAAA-3'      | 406 | 53.1 |
| 12 | C7224329 | A | F | 5'-ATGGATTCCTGCTGA GTT-3'      | 439 | 51.5 |
|    |          |   | R | 5'-AAGCCCTTCATCCTTAGTG-3'      | 439 | 51.7 |

Note:

1, F: forward; R: reverse.

2, Red background indicates the PCR amplification was failed, and the yellow background indicates the PCR amplification was non-specific.

3, Different types, A represents the forward primer located in the new introduced sequence in the gap, while the reverse primer locates on the original scaffolds; B represents the reverse primer located in the new introduced sequence in the gap, while the forward primer locates on the original scaffolds; C represents the gap was filled completely, and the PCR product covered the gap.

**Supplementary Table 8** Primers used to evaluate single base error correction methods.

| Chr. | ID             | Result | Direction | Primes                         | Product length (bp) | TM Value (°C) |
|------|----------------|--------|-----------|--------------------------------|---------------------|---------------|
| 01   | Chr01_31515688 | Y      | F         | 5'-GCA GCATTCAAAGTA GTCC-3'    | 403                 | 50.2          |
|      |                |        | R         | 5'-CAAACCGTGGCAAAATAGTA-3'     | 403                 | 54.2          |
| 01   | Chr01_520442   | Y      | F         | 5'-TCTTTGACCCTTGGTGATG-3'      | 471                 | 53.5          |
|      |                |        | R         | 5'-GGCAAACGCCAAGAAAAT-3'       | 471                 | 56.0          |
| 02   | Chr02_21966715 | Y      | F         | 5'-GTAGTCCTGGATGATTTTGA G-3'   | 489                 | 51.3          |
|      |                |        | R         | 5'-GACGATTGCTTAGGGTATG-3'      | 489                 | 50.4          |
| 02   | Chr02_514372   | Y      | F         | 5'-CATCATCGCATAAGTTGGC-3'      | 434                 | 54.5          |
|      |                |        | R         | 5'-GGATTGGAA GGGATTA GA GTA-3' | 434                 | 53.1          |
| 02   | Chr02_11342411 | Y      | F         | 5'-TAGCCATACATTTTGTCCAG-3'     | 485                 | 51.2          |
|      |                |        | R         | 5'-ATACTTGTTGAGCCTTTGC-3'      | 485                 | 50.1          |
| 03   | Chr03_441478   | Y      | F         | 5'-AAATCGTTTCGGAGCAA G-3'      | 431                 | 53.4          |
|      |                |        | R         | 5'-CAGTCATACAACCAA GCATC-3'    | 431                 | 50.7          |
| 03   | Chr03_2528131  | Y      | F         | 5'-GATTCCATCCAA CCATAAGC-3'    | 455                 | 54.4          |
|      |                |        | R         | 5'-CTCGGCATCCTCCTACAA-3'       | 455                 | 53.6          |
| 03   | Chr03_4824809  | Y      | F         | 5'-ATGGGTATCCA GTGTTGC-3'      | 495                 | 50.1          |
|      |                |        | R         | 5'-TAATGGATTGCTTGCCTC-3'       | 495                 | 51.3          |
| 03   | Chr03_23356087 | N      | F         | 5'-CCTCATCCTGCTTTCGTG-3'       | 421                 | 54.0          |
|      |                |        | R         | 5'-TTCATCGGCTCCTCCTCA-3'       | 421                 | 56.5          |
| 04   | Chr04_1558863  | Y      | F         | 5'-CACCTGACCCAA GCCATT-3'      | 438                 | 55.8          |
|      |                |        | R         | 5'-TTCCCGACCCAAATCAAC-3'       | 438                 | 55.9          |
| 04   | Chr04_2187887  | Y      | F         | 5'-GAGTGA GAA GCCTGAGACG-3'    | 439                 | 52.2          |
|      |                |        | R         | 5'-GTATGGGCTGACATTGGA-3'       | 439                 | 51.0          |

|    |                |   |   |                               |     |      |
|----|----------------|---|---|-------------------------------|-----|------|
| 05 | Chr05_1591959  | Y | F | 5'-TGATTA GTGCCA GTCTCCA-3'   | 447 | 51.2 |
|    |                |   | R | 5'-AATCA GAACA GCAA CAACG-3'  | 447 | 51.2 |
| 05 | Chr05_2148100  | Y | F | 5'-TACTTTGCTGGCTGCTCT-3'      | 455 | 51.2 |
|    |                |   | R | 5'-AAGTCAAACA GTGGGGTATT-3'   | 455 | 51.1 |
| 05 | Chr05_3683921  | Y | F | 5'-TA GCCTCCA GTGGTTCAA-3'    | 492 | 51.2 |
|    |                |   | R | 5'-TGATGTA GCCATTTGTGA GA-3'  | 492 | 51.6 |
| 05 | Chr05_5371264  | Y | F | 5'-CAAAACATCAAAACCTCCCA-3'    | 452 | 55.8 |
|    |                |   | R | 5'-TTCCCCAACA GCCTTCTT-3'     | 452 | 55.0 |
| 05 | Chr05_22124925 | Y | F | 5'-GAA GCA CA GTTCCA GGTTG-3' | 412 | 53.1 |
|    |                |   | R | 5'-TCTCAATGGAA GGCAA GG-3'    | 412 | 53.6 |
| 06 | Chr06_15963277 | Y | F | 5'-TTGGCGAA CA GGGTA GTA-3'   | 471 | 51.7 |
|    |                |   | R | 5'-GATAATGGA GGA GAA GGCT-3'  | 471 | 50.6 |
| 06 | Chr06_21241690 | Y | F | 5'-TTGTTACTA CCTCTGTCCCATA-3' | 473 | 52.1 |
|    |                |   | R | 5'-ACCA GTCCCTA CACTCCGT-3'   | 473 | 53.6 |
| 07 | Chr07_4847390  | Y | F | 5'-AGTTGTTTGGCTATCCTTGG-3'    | 431 | 54.5 |
|    |                |   | R | 5'-CATTGTTTGATTGTGGCAGT-3'    | 431 | 53.9 |
| 07 | Chr07_6645423  | Y | F | 5'-TGACTTGGACATA GGGCTTGA-3'  | 483 | 58.0 |
|    |                |   | R | 5'-AGA GGCTTCGGGTCGTTAC-3'    | 483 | 56.7 |
| 07 | Chr07_12953515 | Y | F | 5'-ATGGAA GGCAGCATTAGTT-3'    | 461 | 52.2 |
|    |                |   | R | 5'-AATGCGTTGCTCGTGTCA-3'      | 461 | 55.8 |
| 08 | Chr08_97825    | Y | F | 5'-GTA GAGTCATCGTCATCCTTC-3'  | 461 | 50.9 |
|    |                |   | R | 5'-ACCATCCAACATTTCCCT-3'      | 461 | 51.5 |
| 08 | Chr08_265350   | Y | F | 5'-TGCGACGCTTCCTCATA G-3'     | 496 | 55.0 |
|    |                |   | R | 5'-TCCTTCATACCTA CCTACGG-3'   | 496 | 52.0 |
| 08 | Chr08_19940031 | Y | F | 5'-GCCAAA ACTCCA CTTCTCC-3'   | 487 | 54.3 |
|    |                |   | R | 5'-GCAACAACA ACCTTCCAATA-3'   | 487 | 53.6 |

|    |                |   |   |                            |     |      |
|----|----------------|---|---|----------------------------|-----|------|
| 09 | Chr09_66838    | Y | F | 5'-ATCCCTATCTGTTGACGCC-3'  | 444 | 54.5 |
|    |                |   | R | 5'-ATTCTGATTCCCCATTCC-3'   | 444 | 51.2 |
| 09 | Chr09_485749   | Y | F | 5'-CGAAGTGGCTACTATGGC-3'   | 469 | 51.0 |
|    |                |   | R | 5'-CACTCAGAGGACTACCCAAC-3' | 469 | 51.3 |
| 10 | Chr10_10089666 | Y | F | 5'-GCACCGAATCCAGCCCTAT-3'  | 472 | 59.7 |
|    |                |   | R | 5'-TTCCGCCACCCTTCTACTC-3'  | 472 | 57.4 |
| 10 | Chr10_10301587 | Y | F | 5'-ATCCTCGCTCGTATCCGTT-3'  | 431 | 57.0 |
|    |                |   | R | 5'-AAGAAA GCCCGTTGTTGG-3'  | 431 | 55.8 |
| 11 | Chr11_6999575  | Y | F | 5'-GAATAAGGTGCGAGGAACA-3'  | 410 | 53.2 |
|    |                |   | R | 5'-GCAAGCAGAGCAAGAAAGT-3'  | 410 | 52.9 |

**Note:** Y indicated the amplification was successful, N indicated the sequence which we amplified wasn't nearby the site we selected.

**Supplementary Table 9** Summary of structural variations in three comparisons.

|                   |           | <b>No. of SVs</b> | <b>Total length<br/>(kb)</b> | <b>Average length<br/>(bp)</b> |
|-------------------|-----------|-------------------|------------------------------|--------------------------------|
| <i>9311_TIGR</i>  | Insertion | 200935            | 1593                         | NA                             |
|                   | Deletion  | 202285            | 1660                         | NA                             |
|                   | Inversion | 260               | 427                          | 1643                           |
| <i>PA64s_TIGR</i> | Insertion | 164570            | 1223                         | NA                             |
|                   | Deletion  | 161161            | 1321                         | NA                             |
|                   | Inversion | 176               | 266                          | 1514                           |
| <i>PA64s_9311</i> | Insertion | 156397            | 1062                         | NA                             |
|                   | Deletion  | 149567            | 1018                         | NA                             |
|                   | Inversion | 323               | 561                          | 1738                           |

**Note:** We aligned the updated *93-11* genome sequence and the newly assembly of *PA64s* against the reference sequence *Nipponbare*, and also aligned the *PA64s* genome against *93-11*.

**Supplementary Table 10** Summary of evidence for the GLEAN gene models. P: *ab initio* prediction; H: homology-based; C: cDNA/EST expressed genes. According to number of gene sources support, the evidence was further separated into single (with one gene source) and more (with two or more gene sources). The overlap threshold is relative to the CDS region of GLEAN genes.

|            | ≥20% overlap |             | ≥50% overlap |             | ≥80% overlap |             |
|------------|--------------|-------------|--------------|-------------|--------------|-------------|
|            | Number       | Percent (%) | Number       | Percent (%) | Number       | Percent (%) |
| P (single) | 80           | 0.22        | 709          | 1.92        | 3722         | 10.08       |
| P (more)   | 7851         | 21.27       | 8989         | 24.35       | 9612         | 26.04       |
| H (single) | 1            | 0           | 15           | 0.04        | 100          | 0.27        |
| H (more)   | 2            | 0.01        | 18           | 0.05        | 141          | 0.38        |
| P+H        | 28972        | 78.5        | 27152        | 73.56       | 23048        | 62.45       |

**Supplementary Table 11** Summary of predicted protein-coding genes of *PA64s*.

| Gene set                  |          | Number | Average transcript length (bp) | Average CDS length (bp) | Average exons number | Average exon length (bp) | Average intron length (bp) |
|---------------------------|----------|--------|--------------------------------|-------------------------|----------------------|--------------------------|----------------------------|
| <i>De novo</i> prediction | Augustus | 38,079 | 2381.33                        | 897.93                  | 3.28                 | 273.7                    | 650.43                     |
|                           | Fgenesh  | 37,049 | 2716.2                         | 1171.37                 | 4.64                 | 252.37                   | 424.24                     |
|                           | Genscan  | 43,548 | 3627.82                        | 712.3                   | 2.97                 | 239.73                   | 1478.98                    |
| Homolog prediction        | Maize    | 45,243 | 1654.59                        | 790.87                  | 2.95                 | 267.88                   | 442.39                     |
|                           | Rice     | 78,492 | 1141.91                        | 585.29                  | 2.5                  | 234.08                   | 371                        |
|                           | Sorghum  | 34,052 | 2293.47                        | 989.38                  | 3.69                 | 268.19                   | 484.96                     |
| Glean                     |          | 36,909 | 2605.07                        | 1110.2                  | 4.1                  | 270.55                   | 481.67                     |



**Supplementary Table 12** Functional annotation for *PA64s* genome based on different databases.

|             | <b>Number</b> | <b>Percent (%)</b> |
|-------------|---------------|--------------------|
| Total       | 36909         | -                  |
| Annotated   | 35845         | 97.12              |
| Swissprot   | 23007         | 62.33              |
| TrEMBL      | 35838         | 97.1               |
| InterPro    | 25021         | 67.79              |
| KEGG        | 17849         | 48.36              |
| GO          | 18978         | 51.42              |
| Unannotated | 1064          | 2.88               |

**Supplementary Table 13** Summary of predicted protein-coding genes of *93-11*.

| Gene set                  |                  | Number  | Average Transcript Length (bp) | Average CDS Length (bp) | Average Exons per Gene | Average Exon Length (bp) | Average Intron Length (bp) |
|---------------------------|------------------|---------|--------------------------------|-------------------------|------------------------|--------------------------|----------------------------|
| <i>De novo</i> prediction | Augustus         | 41,991  | 2269.39                        | 864.25                  | 3.11                   | 278.21                   | 667.06                     |
|                           | Genscan          | 47,383  | 3606.9                         | 711.96                  | 2.99                   | 238.23                   | 1455.81                    |
|                           | Fgenesh          | 39,792  | 2644.45                        | 1146.92                 | 4.49                   | 255.39                   | 429                        |
| Homolog prediction        | <i>O.sativa</i>  | 105,569 | 1126.62                        | 583.92                  | 2.38                   | 245.44                   | 393.54                     |
|                           | <i>Z.mays</i>    | 58,547  | 1698.25                        | 824.81                  | 2.81                   | 293.91                   | 483.55                     |
|                           | <i>S.bicolor</i> | 40,514  | 2459.59                        | 1036.77                 | 3.58                   | 289.75                   | 551.86                     |
| EST prediction            | <i>O.sativa</i>  | 51,401  | 12597.69                       | 770.83                  | 3.12                   | 246.88                   | 5572.68                    |
| GLEAN                     |                  | 40,464  | 2494.96                        | 1070.08                 | 3.98                   | 269.18                   | 478.9                      |

**Supplementary Table 14** Twelve traits of *93-11* and *PA64s* observed in Hangzhou (HZ) and Hainan (HN).

| Trait   | <i>93-11</i> -HZ | <i>PA64s</i> -HZ | <i>93-11</i> -HN | <i>PA64s</i> -HN |
|---------|------------------|------------------|------------------|------------------|
| HD (d)  | 92               | 85               | 100              | 95               |
| PH (cm) | 130.0 ± 3.0**    | 72.0 ± 2.0       | 122.2 ± 3.5**    | 69.5 ± 3.0       |
| ETN     | 9.0 ± 1.7        | 12.3 ± 1.5       | 10.4 ± 1.0       | 12.9 ± 1.2       |
| SN      | 214.0 ± 28.0**   | 193.0 ± 7.1      | 214.3 ± 21.9**   | 177.3 ± 17.0     |
| PL (cm) | 26.1 ± 0.1*      | 24.8 ± 0.6       | 25.6 ± 1.2*      | 24.0 ± 0.5       |
| PPB     | 10.7 ± 0.6       | 11.0 ± 1.0       | 11.7 ± 0.6       | 12.0 ± 1.1       |
| SPB     | 66.5 ± 2.1**     | 43.5 ± 2.1       | 55.3 ± 5.9**     | 39.5 ± 4.0       |
| SS (%)  | 88.9 ± 2.9**     | 0.7 ± 0.4        | 95.8 ± 0.7**     | 4.1 ± 5.8        |
| TGW (g) | 30.80 ± 0.30**   | 3.41 ± 0.07      | 28.17 ± 0.12**   | 21.83 ± 0.40     |
| GL (mm) | 9.74 ± 0.28**    | 8.40 ± 0.22      | 9.46 ± 0.23**    | 8.75 ± 0.06      |
| GW (mm) | 2.64 ± 0.05**    | 2.44 ± 0.09      | 3.05 ± 0.07**    | 2.65 ± 0.12      |
| PY (g)  | 29.53 ± 0.22**   | 0.00 ± 0.00      | 19.13 ± 0.50**   | 4.30 ± 0.42      |

Mean ±SD. (n=6).

\* and \*\* indicate the least significant difference at 0.05 and 0.01 probability level compared with *PA64s* in HZ or HN, respectively.

**Supplementary Table 15** Correlation analysis of 12 yield-associated traits in Hangzhou (HZ).

|        | HD-HZ                     | PH-HZ                      | ETN-HZ                     | SN-HZ                     | PL-HZ                     | PPB-HZ                    | SPB-HZ                    | SS-HZ                     | TGW-HZ                    | GL-HZ               | GW-HZ               |
|--------|---------------------------|----------------------------|----------------------------|---------------------------|---------------------------|---------------------------|---------------------------|---------------------------|---------------------------|---------------------|---------------------|
| PH-HZ  | <b>0.4656</b><br>(0.0001) |                            |                            |                           |                           |                           |                           |                           |                           |                     |                     |
| ETN-HZ | -0.1598<br>(0.0683)       | <b>-0.3001</b><br>(0.0005) |                            |                           |                           |                           |                           |                           |                           |                     |                     |
| SN-HZ  | 0.1883<br>(0.0313)        | <b>0.4586</b><br>(0.0001)  | -0.2265<br>(0.0093)        |                           |                           |                           |                           |                           |                           |                     |                     |
| PL-HZ  | 0.0203<br>(0.8181)        | <b>0.5611</b><br>(0.0001)  | <b>-0.3433</b><br>(0.0001) | <b>0.5056</b><br>(0.0001) |                           |                           |                           |                           |                           |                     |                     |
| PPB-HZ | <b>0.3816</b><br>(0.0001) | <b>0.2977</b><br>(0.0006)  | -0.2112<br>(0.0155)        | <b>0.5155</b><br>(0.0001) | <b>0.3349</b><br>(0.0001) |                           |                           |                           |                           |                     |                     |
| SPB-HZ | 0.1138<br>(0.1955)        | <b>0.3460</b><br>(0.0001)  | -0.1232<br>(0.1609)        | <b>0.8436</b><br>(0.0001) | <b>0.4121</b><br>(0.0001) | <b>0.3847</b><br>(0.0001) |                           |                           |                           |                     |                     |
| SS-HZ  | 0.0436<br>(0.6211)        | <b>0.4051</b><br>(0.0001)  | -0.0343<br>(0.6975)        | 0.0679<br>(0.4392)        | 0.0955<br>(0.2762)        | -0.0609<br>(0.4882)       | 0.0519<br>(0.5548)        |                           |                           |                     |                     |
| TGW-HZ | 0.1154<br>(0.1893)        | <b>0.3571</b><br>(0.0001)  | -0.1664<br>(0.0575)        | -0.1305<br>(0.1357)       | 0.2315<br>(0.0076)        | 0.0200<br>(0.8201)        | -0.0733<br>(0.4037)       | <b>0.2724</b><br>(0.0016) |                           |                     |                     |
| GL-HZ  | -0.1166<br>(0.1847)       | 0.1871<br>(0.0323)         | -0.1991<br>(0.0226)        | -0.0852<br>(0.3315)       | <b>0.3584</b><br>(0.0001) | -0.0541<br>(0.5382)       | -0.0801<br>(0.3615)       | 0.0037<br>(0.9666)        | <b>0.4086</b><br>(0.0001) |                     |                     |
| GW-HZ  | <b>0.3303</b><br>(0.0001) | 0.1417<br>(0.1065)         | -0.2049<br>(0.0189)        | -0.0571<br>(0.5157)       | -0.0191<br>(0.8278)       | 0.0506<br>(0.5646)        | -0.0574<br>(0.5130)       | -0.1185<br>(0.1760)       | <b>0.4071</b><br>(0.0001) | -0.0760<br>(0.3868) |                     |
| PY-HZ  | 0.0691<br>(0.4331)        | <b>0.5373</b><br>(0.0001)  | 0.0309<br>(0.7263)         | <b>0.3844</b><br>(0.0001) | <b>0.2784</b><br>(0.0012) | 0.0845<br>(0.3354)        | <b>0.3521</b><br>(0.0001) | <b>0.6100</b><br>(0.0001) | <b>0.2506</b><br>(0.0038) | 0.0456<br>(0.6034)  | -0.0821<br>(0.3493) |

**Note:** Pearson correlation coefficients (Prob > |R| under Ho:Rho=0/number of observations) with Prob > 0.005 are shown in bold.

**Supplementary Table 16** Correlation analysis of 12 yield-associated traits in Hainan (HN).

|        | HD-HN                            | PH-HN                            | ETN-HN              | SN-HN                            | PL-HN                            | PPB-HN                           | SPB-HN              | SS-HN               | TGW-HN                           | GL-HN              | GW-HN              |
|--------|----------------------------------|----------------------------------|---------------------|----------------------------------|----------------------------------|----------------------------------|---------------------|---------------------|----------------------------------|--------------------|--------------------|
| PH-HN  | -0.0276<br>(0.7639)              |                                  |                     |                                  |                                  |                                  |                     |                     |                                  |                    |                    |
| ETN-HN | 0.0693<br>(0.4717)               | 0.1683<br>(0.0761)               |                     |                                  |                                  |                                  |                     |                     |                                  |                    |                    |
| SN-HN  | 0.2359<br>(0.0095)               | 0.2114<br>(0.0222)               | 0.1529<br>(0.1176)  |                                  |                                  |                                  |                     |                     |                                  |                    |                    |
| PL-HN  | 0.1259<br>(0.1707)               | <b>0.2645</b><br><b>(0.0040)</b> | 0.1666<br>(0.0879)  | <b>0.4976</b><br><b>(0.0001)</b> |                                  |                                  |                     |                     |                                  |                    |                    |
| PPB-HN | <b>0.4980</b><br><b>(0.0001)</b> | 0.0021<br>(0.9820)               | 0.0575<br>(0.5584)  | <b>0.4305</b><br><b>(0.0001)</b> | 0.1699<br>(0.0636)               |                                  |                     |                     |                                  |                    |                    |
| SPB-HN | 0.2379<br>(0.0089)               | 0.2368<br>(0.0102)               | 0.0419<br>(0.6697)  | <b>0.6751</b><br><b>(0.0001)</b> | <b>0.3364</b><br><b>(0.0002)</b> | <b>0.4151</b><br><b>(0.0001)</b> |                     |                     |                                  |                    |                    |
| SS-HN  | 0.0176<br>(0.8664)               | 0.1291<br>(0.2052)               | -0.0207<br>(0.8490) | 0.0374<br>(0.7248)               | 0.2221<br>(0.0343)               | -0.0457<br>(0.6674)              | 0.0885<br>(0.4040)  |                     |                                  |                    |                    |
| TGW-HN | 0.1330<br>(0.1476)               | 0.1560<br>(0.0931)               | -0.0232<br>(0.8133) | -0.1281<br>(0.1652)              | 0.0823<br>(0.3739)               | -0.0030<br>(0.9743)              | -0.0880<br>(0.3411) | 0.0608<br>(0.5670)  |                                  |                    |                    |
| GL-HN  | -0.0159<br>(0.8614)              | <b>0.2792</b><br><b>(0.0014)</b> | -0.0005<br>(0.9954) | 0.0109<br>(0.9062)               | 0.1955<br>(0.0332)               | -0.1352<br>(0.1428)              | -0.1033<br>(0.2635) | -0.0367<br>(0.7158) | <b>0.3757</b><br><b>(0.0001)</b> |                    |                    |
| GW-HN  | 0.0103<br>(0.9096)               | 0.1794<br>(0.0427)               | -0.0562<br>(0.5524) | 0.1093<br>(0.2369)               | -0.0097<br>(0.9164)              | 0.0539<br>(0.5606)               | 0.0136<br>(0.8835)  | 0.0429<br>(0.6704)  | 0.1221<br>(0.1858)               | 0.0113<br>(0.8979) |                    |
| PY-HN  | -0.0538<br>(0.5933)              | 0.2070<br>(0.0350)               | -0.1338<br>(0.2062) | -0.0063<br>(0.9509)              | 0.0105<br>(0.9186)               | -0.1399<br>(0.1717)              | 0.0291<br>(0.7775)  | 0.1618<br>(0.1517)  | 0.1068<br>(0.2977)               | 0.2600<br>(0.0074) | 0.0817<br>(0.4075) |

**Note:** Pearson correlation coefficients (Prob > |R| under Ho:Rho=0/number of observations) with Prob > 0.005 are shown in bold.

**Supplementary Table 17** Additive QTLs for twelve traits detected in RIL population derived from *93-11* and *PA64s* in Hainan and Hangzhou and reported QTLs or genes.

| Trait | Site | QTL            | Chr. | Pos (cM)      | LOD   | P value | PVE   | SE     | Reference/Gene |
|-------|------|----------------|------|---------------|-------|---------|-------|--------|----------------|
| HD    | HZ   | <i>qHD8</i>    | 8    | 22.53-25.99   | 14.24 | 0.01    | 0.349 | 9.209  | <i>DTH8</i>    |
| HD    | HN   | <i>qHD8</i>    | 8    | 22.53-28.88   | 3.62  | 0.01    | 0.127 | 3.450  | <i>DTH8</i>    |
| HD    | RD   | <i>Qhd8</i>    | 8    | 7.91-27.53    |       |         |       |        | 43             |
| HD    | HZ   | <i>qHD10</i>   | 10   | 22.9-36.15    | 4.73  | 0.01    | 0.096 | 4.828  |                |
| PH    | HZ   | <i>qPH2</i>    | 2    | 56.44-62.61   | 9.35  | 0.00    | 0.112 | 10.120 |                |
| PH    | RD   | <i>Ph2-1</i>   | 2    | 38.85-60.67   |       |         |       |        | 44             |
| PH    | HN   | <i>qPH3</i>    | 3    | 30.84-38.16   | 5.07  | 0.01    | 0.158 | 7.144  |                |
| PH    | RD   | <i>qPHT-3</i>  | 3    | 25.47-51.21   |       |         |       |        | 45             |
| PH    | HZ   | <i>qPH5</i>    | 5    | 89.61-100.48  | 4.89  | 0.00    | 0.065 | 7.737  | <i>EU11</i>    |
| PH    | HZ   | <i>qPH6</i>    | 6    | 55.66-61.48   | 4.66  | 0.01    | 0.096 | 9.217  |                |
| PH    | RD   | <i>qph6f</i>   | 6    | 55.47-66.62   |       |         |       |        | 46             |
| PH    | HZ   | <i>qPH8</i>    | 8    | 28.88-32.95   | 13.58 | 0.01    | 0.268 | 15.357 |                |
| PH    | HZ   | <i>qPH11</i>   | 11   | 72.84-81.97   | 4.87  | 0.01    | 0.079 | -8.360 |                |
| PH    | HZ   | <i>qPH12</i>   | 12   | 70.84-91.33   | 3.80  | 0.01    | 0.085 | 8.634  | <i>NRL1</i>    |
| PH    | RD   | <i>ph12.1</i>  | 12   | 67.36-105.43  |       |         |       |        | 47             |
| ETN   | HZ   | <i>qETN4</i>   | 4    | 93.92-107.92  | 2.82  | 0.01    | 0.134 | -1.613 | <i>HTD1</i>    |
| PL    | HZ   | <i>qPL2</i>    | 2    | 55.86-63.00   | 4.43  | 0.01    | 0.081 | 1.456  |                |
| PL    | HZ   | <i>qPL4</i>    | 4    | 107.15-113.50 | 5.10  | 0.01    | 0.093 | 1.557  |                |
| PL    | RD   | <i>qPLT4-1</i> | 4    | 100.82-124.27 |       |         |       |        | 48             |
| PL    | HZ   | <i>qPL5</i>    | 5    | 73.09-82.60   | 5.27  | 0.01    | 0.099 | 1.610  |                |
| PL    | RD   | <i>unnamed</i> | 5    | 48.21-74.05   |       |         |       |        | 49             |
| PL    | HZ   | <i>qPL11</i>   | 11   | 77.05-82.93   | 7.55  | 0.01    | 0.158 | -2.026 |                |
| PL    | RD   | <i>unnamed</i> | 11   | 66.67-82.16   |       |         |       |        | 50             |
| PPB   | HZ   | <i>qPPB3</i>   | 3    | 2.55-12.60    | 4.00  | 0.01    | 0.094 | -0.986 |                |

|     |    |                 |    |               |      |      |       |        |                  |
|-----|----|-----------------|----|---------------|------|------|-------|--------|------------------|
| PPB | HZ | <i>qPPB8</i>    | 8  | 23.10-28.30   | 6.03 | 0.01 | 0.153 | 1.258  |                  |
| SPB | HZ | <i>qSPB1</i>    | 1  | 115.40-125.75 | 2.70 | 0.01 | 0.100 | 3.489  | <i>LAX1</i>      |
| SPB | RD | <i>qNSB1-1</i>  | 1  | 119.99-168.93 |      |      |       |        | 51               |
| SN  | HZ | <i>qSN8</i>     | 8  | 23.10-30.45   | 3.97 | 0.01 | 0.136 | 35.533 | <i>DTH8</i>      |
| SN  | RD | <i>spp8a</i>    | 8  | 26.18-37.23   |      |      |       |        | 52               |
| SN  | HZ | <i>qSN9</i>     | 9  | 30.43-38.53   | 3.75 | 0.01 | 0.118 | 33.190 |                  |
| SS  | HZ | <i>qSS1</i>     | 1  | 152.06-163.73 | 3.23 | 0.01 | 0.248 | 0.176  |                  |
| SS  | RD | <i>qBSSR1</i>   | 1  | 132.47-175.17 |      |      |       |        | 53               |
| SS  | HZ | <i>qSS6</i>     | 6  | 61.67-67.40   | 3.08 | 0.03 | 0.091 | 0.107  |                  |
| SS  | HN | <i>qSS12</i>    | 12 | 75.69-90.37   | 3.36 | 0.01 | 0.252 | 0.159  | <i>P/TMS12-1</i> |
| SS  | RD | <i>qSSR12-1</i> | 12 | 88.24-105.43  |      |      |       |        | 54               |
| GL  | HZ | <i>qGL1</i>     | 1  | 15.99-20.64   | 4.27 | 0.01 | 0.097 | 0.331  |                  |
| GL  | HN | <i>qGL1</i>     | 1  | 16.98-22.60   | 3.74 | 0.01 | 0.104 | 0.296  |                  |
| GL  | HZ | <i>qGL3</i>     | 3  | 47.67-55.91   | 4.98 | 0.01 | 0.113 | 0.358  | <i>GS3</i>       |
| GL  | HN | <i>qGL3</i>     | 3  | 49.26-57.64   | 4.36 | 0.01 | 0.147 | 0.353  | <i>GS3</i>       |
| GL  | RD | <i>qGL-3</i>    | 3  | 55.72-57.45   |      |      |       |        | 55               |
| GL  | HZ | <i>qGL6</i>     | 6  | 3.86-12.56    | 3.80 | 0.01 | 0.082 | 0.287  |                  |
| GL  | HN | <i>qGL6</i>     | 6  | 0.00-13.51    | 4.83 | 0.00 | 0.112 | 0.280  |                  |
| GL  | HZ | <i>qGL11</i>    | 11 | 74.18-82.16   | 4.30 | 0.01 | 0.096 | -0.330 |                  |
| GW  | HZ | <i>qGW2</i>     | 2  | 137.85-142.71 | 3.83 | 0.01 | 0.124 | 0.108  |                  |
| GW  | HN | <i>qGW2</i>     | 2  | 136.89-142.71 | 5.40 | 0.01 | 0.140 | 0.123  |                  |
| GW  | RD | <i>qGW-2-3</i>  | 2  | 132.60-138.24 |      |      |       |        | 56               |
| GW  | HZ | <i>qGW4</i>     | 4  | 128.71-134.12 | 5.39 | 0.01 | 0.071 | 0.087  |                  |
| GW  | HN | <i>qGW4</i>     | 4  | 127.72-134.12 | 6.21 | 0.01 | 0.161 | 0.132  |                  |
| GW  | HZ | <i>qGW8</i>     | 8  | 16.27-28.49   | 5.41 | 0.01 | 0.072 | 0.088  |                  |
| GW  | HN | <i>qGW12</i>    | 12 | 97.16-104.66  | 3.00 | 0.01 | 0.082 | -0.094 |                  |
| TGW | HN | <i>qTGW1</i>    | 1  | 19.49-28.08   | 5.09 | 0.00 | 0.115 | 1.208  |                  |
| TGW | RD | <i>gw1a</i>     | 1  | 17.74-26.90   |      |      |       |        | 57               |

|     |    |                |    |               |      |      |       |       |    |
|-----|----|----------------|----|---------------|------|------|-------|-------|----|
| TGW | HZ | <i>qTGW2</i>   | 2  | 137.85-145.60 | 3.51 | 0.01 | 0.085 | 1.799 |    |
| TGW | RD | <i>qTGW2-2</i> | 2  | 138.24-156.90 |      |      |       |       | 58 |
| TGW | HZ | <i>qTGW4</i>   | 4  | 130.43-134.12 | 6.41 | 0.01 | 0.163 | 2.487 |    |
| TGW | RD | <i>tgwt4</i>   | 4  | 124.27-134.12 |      |      |       |       | 59 |
| PY  | HZ | <i>qPY4</i>    | 4  | 12.95-22.97   | 5.05 | 0.01 | 0.108 | 5.846 |    |
| PY  | HZ | <i>qPY6</i>    | 6  | 55.85-64.33   | 4.57 | 0.01 | 0.125 | 6.290 |    |
| PY  | RD | <i>unnamed</i> | 6  | 56.62-66.62   |      |      |       |       | 60 |
| PY  | HZ | <i>qPY8</i>    | 8  | 25.99-31.61   | 4.53 | 0.01 | 0.096 | 5.519 |    |
| PY  | HZ | <i>qPY12</i>   | 12 | 72.76-91.33   | 3.05 | 0.01 | 0.084 | 5.152 |    |

**Note:** PVE is the percentage of phenotypic variation explained by the detected QTL; SE is substitution effect.

#### References for Supplementary Table 17

43. Mei HW, et al. (2003) Gene actions of QTLs affecting several agronomic traits resolved in a recombinant inbred rice population and two testcross populations. *Theor Appl Genet* 107(1):89-101.
44. Cao G, et al. (2001) Impact of epistasis and QTL  $\times$  environment interaction on the developmental behavior of plant height in rice (*Oryza sativa* L.). *Theor Appl Genet* 103(1):153-160.
45. Senthilvel S, Vinod KK, Malarvizhi P, Maheswaran M (2008) QTL and QTL  $\times$  environment effects on agronomic and nitrogen acquisition traits in rice. *J Integr Plant Biol* 50(9):1108-1117.
46. Liang YS, et al. (2011) Mapping and comparative analysis of QTL for rice plant height based on different sample sizes within a single line in RIL population. *Rice Sci*, 2011, 18(4): 265-272.
47. Xiao JH, et al. (1998) Identification of trait-improving quantitative trait loci alleles from a wild rice relative, *Oryza rufipogon*. *Genetics* 150(2):899-909.
48. Guo Y, Hong D. (2010) Novel pleiotropic loci controlling panicle architecture across environments in japonica rice (*Oryza sativa* L.). *J Genet Genomics* 37(8):533-544.
49. Yoshida S, et al. (2002) QTL Analysis for Plant and Grain Characters of Sake-brewing Rice Using a Doubled Haploid Population, *Breeding Sci* 52(4): 309-317.
50. Brondani C, Rangel N, Brondani V, Ferreira E (2002) QTL mapping and introgression of yield-related traits from *Oryza glumaepatula* to cultivated rice (*Oryza sativa*) using microsatellite markers. *Theor Appl Genet* 104(6-7):1192-1203.
51. Cui KH, Peng SB, Xing YZ, Yu SB, Xu CG (2002) Genetic analysis of the panicle traits related to yield sink size of rice. *Acta genetica Sinica* 29(2):144-152.



52. Xiao JH, Li JM, Yuan LP, Tanksley SR. (1996) Identification of QTLs affecting traits of agronomic importance in a recombinant inbred population derived from a subspecific rice cross. *Theor Appl Genet* 92(2):230-244.
53. Han LZ, et al. (2006) Identification of QTLs for seed setting rate in rice under different growing environments. *Acta agronomica sinica* 32(7):1024-1030.
54. Chen QQ, Yu SB, Li CH, Mou TM (2007) Identification of QTL for seed setting rate of rice in eight various environments. *Chinese J Agri Biotech* 4(3):239-245.
55. Wang L, et al. (2011) Mapping 49 quantitative trait loci at high resolution through sequencing-based genotyping of rice recombinant inbred lines. *Theor Appl Genet* 122(2):327-340.
56. Jiang LR, et al. (2009) Analysis of epistatic and QE interaction effects of QTL for grain shape in rice. *Mol Plant Breed* 7(4):690-698.
57. Hua JP, Xing YZ, Xu CG, Sun XL, Yu SB, Zhang Q. (2002) Genetic dissection of an elite rice hybrid revealed that heterozygotes are not always advantageous for performance. *Genetics* 162(4):1885-1895.
58. Zhuang JY, et al. (2002) Analysis on additive effects and additive-by-additive epistatic effects of QTLs for yield traits in a recombinant inbred line population of rice. *Theor Appl Genet* 105(8):1137-1145.
59. Lin HX, et al. (1996) RFLP mapping of QTLs for yield and related characters in rice (*Oryza sativa* L.). *Theor Appl Genet* 92(8):920-927.
60. Jiang GH, Xu CG, Li XH, He YQ (2004) Characterization of the genetic basis for yield and its component traits of rice revealed by doubled haploid population. *Acta genetica Sinica*, 31(1):63-72.

**Supplementary Table 18** Primers of SNP and InDel markers for fine mapping.

| Marker   | Forward primer                     | Reverse primer                    | Tm (°C) | Product size (bp) |
|----------|------------------------------------|-----------------------------------|---------|-------------------|
| SNP8-45  | 5'-TTGTA GTC TTTTATA GTTAGG TTC-3' | 5'-TAA GTGATGAAA GAA CA GTCG-3'   | 50      | 543               |
| SNP8-47  | 5'-TCCTACA CACA CCAATAGACGGG-3'    | 5'-TGATGGAA GAAAAATCTGGCA TC-3'   | 60      | 594               |
| SNP1     | 5'-AAGTCTCCGCTCTAATTGAAAC-3'       | 5'-TCTGTAGGAGTTCGGTTGTG-3'        | 53      | 218               |
| IND1     | 5'-ACTTGGTTGTTTGCATTACATG-3'       | 5'-ACAA GTGTATCTTTATTTATTTGTGC-3' | 55      | 83/75*            |
| SNP1-308 | 5'-TATCAA CTGGCTGACCACTG-3'        | 5'-ATACATCAAATTTTGCTTGGATTC-3'    | 58      | 532               |
| SNP1-309 | 5'-TCGCTATCATTGGCTGTCATC-3'        | 5'-TTGACTTCA CAATATCTCCAA GAG-3'  | 55      | 660               |
| SNP2     | 5'-ACCCTGGTCTTAGGTGGGTTG-3'        | 5'-ACAA GACGAATCA CCGCAAAAG-3'    | 60      | 401               |
| SNP3     | 5'-ATATCATCTGAAATCTGAACTTG-3'      | 5'-TACGTGAGCTACCATCCTTG-3'        | 53      | 365               |
| IND2     | 5'-TCCGCTTTGTCCCTGAGTGTTTC-3'      | 5'-ACCCTTGCAAAAAGCGTTCCA G-3'     | 65      | 98/106*           |

\*93-11/PA64s

**Supplementary Table 19** Primers used for real time PCR of candidate genes.

| Marker          | Forward primer                  | Reverse primer                      | Tm (°C) | Product size (bp) |
|-----------------|---------------------------------|-------------------------------------|---------|-------------------|
| <i>GS3</i>      | 5'-ATGCTCGTGCCGCTGCA CC-3'      | 5'-ACAAGCA GGGGGGCA GCAAC-3'        | 60      | 110               |
| <i>EU11</i>     | 5'-ACGGTGGGGATGGTGGTGC-3'       | 5'-ACGAACA GGTA GGTGCCCTTGG-3'      | 60      | 125               |
| <i>DTH8</i>     | 5'-TCGAGGGTGATGGAGTTCG-3'       | 5'-TTCCTCTT TAGTCTAAACCATTGC-3'     | 58      | 122               |
| <i>HTDI</i>     | 5'-TGGTGCTGGATGCAAA GAAGATAG-3' | 5'-ACCATGGAATCCCATTGGAAAAG-3'       | 55      | 95                |
| <i>LAX1</i>     | 5'-TCCTCAAGGC GCA GGT CAC-3'    | 5'-GCCATCTCCA GCGTCGTC-3'           | 58      | 177               |
| <i>NRL1</i>     | 5'-AAGAGGGACTTCCTCAAGAACAAG-3'  | 5'-TCGTA CT CGCGCTTCA CCTT-3'       | 60      | 74                |
| <i>OsACTIN1</i> | 5'-ACCCCTGCTATGTACGTCGCCATC-3'  | 5'-ACCATCACCA GA GTCCAACACAATACC-3' | 60      | 90                |

**Supplementary Table 20** Phenotype of T<sub>1</sub> plants transformed with pCAMBIA1300-*DTH8*.

| Trait   | PA64s       | T <sub>1</sub> -1 | T <sub>1</sub> -2 | T <sub>1</sub> -3 |
|---------|-------------|-------------------|-------------------|-------------------|
| HD (d)  | 85          | 94                | 99                | 94                |
| PH (cm) | 72.0 ± 2.0  | 90.0 ± 7.5        | 122.0 ± 1.4       | 124.3 ± 2.1       |
| SN      | 193.0 ± 7.1 | 210.0 ± 8.2       | 233.7 ± 12.5      | 225.7 ± 7.8       |

Mean ±SD. (n=6).

**Supplementary Table 21** Regions shared by QTLs and recombinant hotspots.

| Site | QTL/recombinant hot spot | Chr. | Pos (cM)      |
|------|--------------------------|------|---------------|
| HZ   | <i>qSPB1</i>             | 1    | 115.40-125.75 |
|      | RH1-27                   | 1    |               |
|      | RH1-28                   | 1    |               |
|      | RH1-29                   | 1    |               |
|      | RH1-30                   | 1    |               |
| HZ   | <i>qPPB3</i>             | 3    | 2.55-12.60    |
|      | RH3-1                    | 3    |               |
|      | RH3-2                    | 3    |               |
| HZ   | <i>qGL3</i>              | 3    | 47.67-55.91   |
| HN   | <i>qGL3</i>              | 3    | 49.26-57.64   |
|      | RH3-13                   | 3    |               |
|      | RH3-14                   | 3    |               |
|      | RH3-15                   | 3    |               |
| HZ   | <i>qPY4</i>              | 4    | 12.95-22.97   |
|      | RH4-7                    | 4    |               |
|      | RH4-8                    | 4    |               |
|      | RH4-9                    | 4    |               |
|      | RH4-10                   | 4    |               |
|      | RH4-11                   | 4    |               |
| HZ   | <i>qPL4</i>              | 4    | 107.15-113.50 |
|      | RH4-26                   | 4    |               |
|      | RH4-27                   | 4    |               |
| HN   | <i>qGW4</i>              | 4    | 127.72-134.12 |
| HZ   | <i>qGW4</i>              | 4    | 128.71-134.12 |
|      | RH4-31                   | 4    |               |
|      | RH4-32                   | 4    |               |
|      | RH4-33                   | 4    |               |
| HZ   | <i>qPH5</i>              | 5    | 89.61-100.48  |
|      | RH5-28                   | 5    |               |
|      | RH5-29                   | 5    |               |
| HN   | <i>qGL6</i>              | 6    | 0.00-13.51    |
| HZ   | <i>qGL6</i>              | 6    | 3.86-12.56    |
|      | RH6-1                    | 6    |               |
|      | RH6-2                    | 6    |               |
|      | RH6-3                    | 6    |               |
|      | RH6-4                    | 6    |               |
| HZ   | <i>qPH6</i>              | 6    | 55.66-61.48   |
| HZ   | <i>qPY6</i>              | 6    | 55.85-64.33   |
|      | RH6-19                   | 6    |               |
|      | RH6-20                   | 6    |               |

|    |                |    |             |
|----|----------------|----|-------------|
| HZ | <i>qSS6</i>    | 6  | 61.67-67.40 |
|    | RH6-21         | 6  |             |
| HZ | <i>qGW7</i>    | 7  | 13.86-18.46 |
|    | RH7-2          | 7  |             |
| HZ | <i>qPH8</i>    | 8  | 28.88-32.95 |
|    | RH8-3          | 8  |             |
| HZ | <i>qSN9</i>    | 9  | 30.43-38.53 |
| HZ | <i>qSPB9</i>   | 9  | 31.01-38.34 |
|    | RH9-12         | 9  |             |
| HZ | <i>qHD10</i>   | 10 | 22.9-36.15  |
|    | RH10-6         | 10 |             |
|    | RH10-7         | 10 |             |
|    | RH10-8         | 10 |             |
|    | RH10-9         | 10 |             |
|    | RH10-10        | 10 |             |
|    | RH10-11        | 10 |             |
| HZ | <i>qPH11</i>   | 11 | 72.84-81.97 |
|    | RH11-21        | 11 |             |
|    | RH11-22        | 11 |             |
| HZ | <i>qPY11</i>   | 11 | 74.18-81.97 |
| HZ | <i>qGL11</i>   | 11 | 74.18-82.16 |
| HN | <i>qGL11</i>   | 11 | 75.90-82.35 |
| HZ | <i>qPL11</i>   | 11 | 77.05-82.93 |
|    | RH11-23        | 11 |             |
|    | RH11-24        | 11 |             |
| HN | <i>qPH12-1</i> | 12 | 40.14-54.05 |
|    | RH12-6         | 12 |             |
|    | RH12-7         | 12 |             |
|    | RH12-8         | 12 |             |
| HZ | <i>qPH12-2</i> | 12 | 70.84-91.33 |
| HZ | <i>qPY12</i>   | 12 | 72.76-91.33 |
| HN | <i>qSS12</i>   | 12 | 75.69-90.37 |
| HZ | <i>qSS12</i>   | 12 | 78.16-90.37 |
|    | RH12-13        | 12 |             |
|    | RH12-14        | 12 |             |

RH: Recombinant hotspots.

## Supplementary Figures

- **Supplementary Figure 1** Physical positions of SNP markers on each chromosome.
- **Supplementary Figure 2** Two major distortion regions on chromosome 1 and chromosome 12.
- **Supplementary Figure 3** Distribution of recombinant hotspots across 12 chromosomes in the RILs.
- **Supplementary Figure 4** Top enriched DNA motifs identified in sequences surround hotspots.
- **Supplementary Figure 5** Genetic versus physical distance maps of 12 chromosomes. The genetic distance was calculated depending on physical distance and recombination rate using *Kosambi* function. Red triangles point to the positions of centromere on each chromosome.
- **Supplementary Figure 6** An example of falsely anchored scaffolds revealed by linkage map and syntenic analysis. There the region of falsely anchored scaffolds disturbed the normal linkage relationships in the graphic map of genotypes and was not supported by normal syntenic analysis with the reference.
- **Supplementary Figure 7** Synteny analysis among the three genomes: *PA64*, *93-11* and *Nipponbare*: (a) *93-11* vs. *PA64s* (b) *Nipponbare* vs. *PA64s* (c) *93-11* vs. *Nipponbare*.
- **Supplementary Figure 8** Comparative analysis of InDels among three genomes.
- **Supplementary Figure 9** The Venn diagram shows common and unique gene families in *93-11*, *PA64s* and *Nipponbare*. The number of genes belonging to the corresponding families is presented in brackets under the number of families.
- **Supplementary Figure 10** KEGG enrichment of special genes in *93-11* and *PA64s*.
- **Supplementary Figure 11** Distribution of twelve yield component traits of RIL derived from *93-11* and *PA64s* in Hangzhou (HZ) and Hainan (HN). Arrow head represents the trait value of *93-11* or *PA64s*.
- **Supplementary Figure 12** Seven yield-associated traits and five QTL genotypes of four RIL lines and two parents. Abbreviations are indicated as following: heading date (HD), spikelet number per panicle (SN), plant height (PH), effective tiller number (ETN), seed set (SS), 1000-grain weight (TGW), and yield per plant (PY). Bar represents S.D. Five QTLs (*qHD8/qSN8*, *qPH5*, *qETN4*, *qSS12*) cover the loci of cloned candidate genes (*DTH8*, *EU11*, *HTD1*, *P/TMS12-1*), respectively. P represents *PA64s* genotype and 9 for *93-11* genotype.
- **Supplementary Figure 13** Precise locations of nine QTLs and seven candidate genes. Curves indicate chromosome locations (cM) and LOD values of the detected QTLs. Arrow heads represent the relative genetic

positions of candidate genes.

- **Supplementary Figure 14** Expression analysis of candidate genes in *93-11* and *PA64s*. Total RNA was isolated from panicles (for *GS3*, *DTH8*, and *LAX1*) and first internodes (for *EU11* and *NRL1*) in the booting stage, and tiller buds (for *HTD1*) at the tillering stage. The transcript levels of these genes were normalized against those of *OsACTIN1* gene. Values are the mean  $\pm$  S.D. of three replicates.

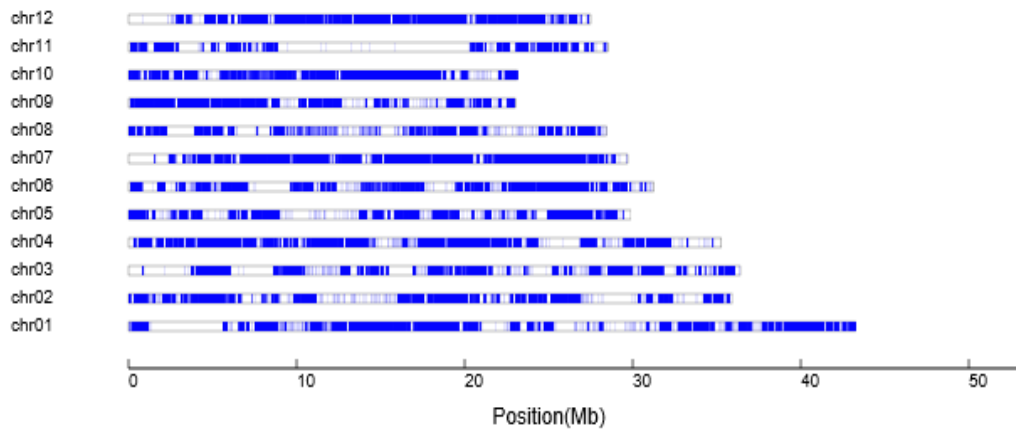

**Supplementary Figure 1** Physical positions of SNP markers on each chromosome.

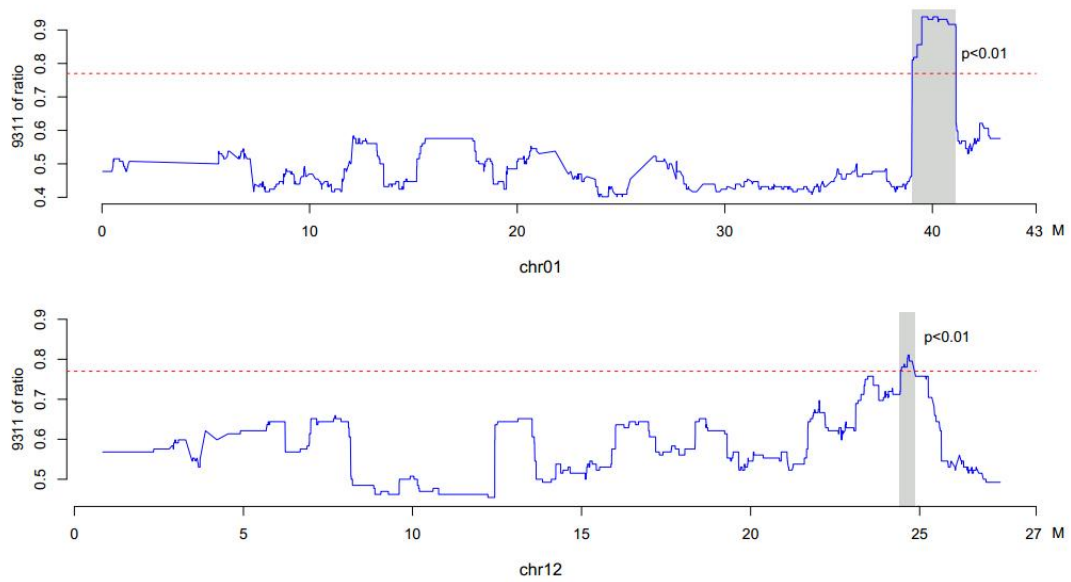

**Supplementary Figure 2** Two major distortion regions on chromosome 1 and chromosome 12.

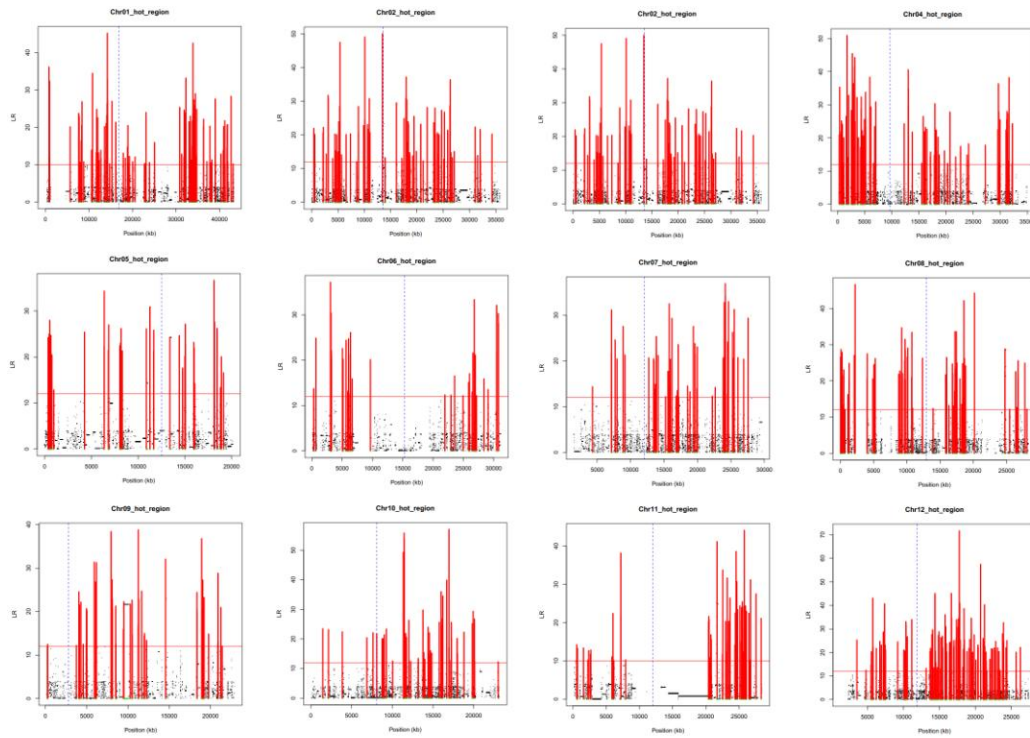

**Supplementary Figure 3** Distribution of recombinant hotspots across 12 chromosomes in the RILs.

| Sequence | E-value  | Presence | Sequence | E-value  | Presence |
|----------|----------|----------|----------|----------|----------|
|          | 1.1e-590 | 210      |          | 4.8e-362 | 150      |
|          | 1.8e-354 | 153      |          | 4.8e-298 | 257      |
|          | 1.4e-296 | 250      |          | 3.8e-275 | 263      |
|          | 7.3e-239 | 211      |          | 9.5e-217 | 269      |
|          | 7.3e-207 | 217      |          | 4.7e-190 | 60       |

**Supplementary Figure 4** Top enriched DNA motifs identified in sequences surround hotspots.



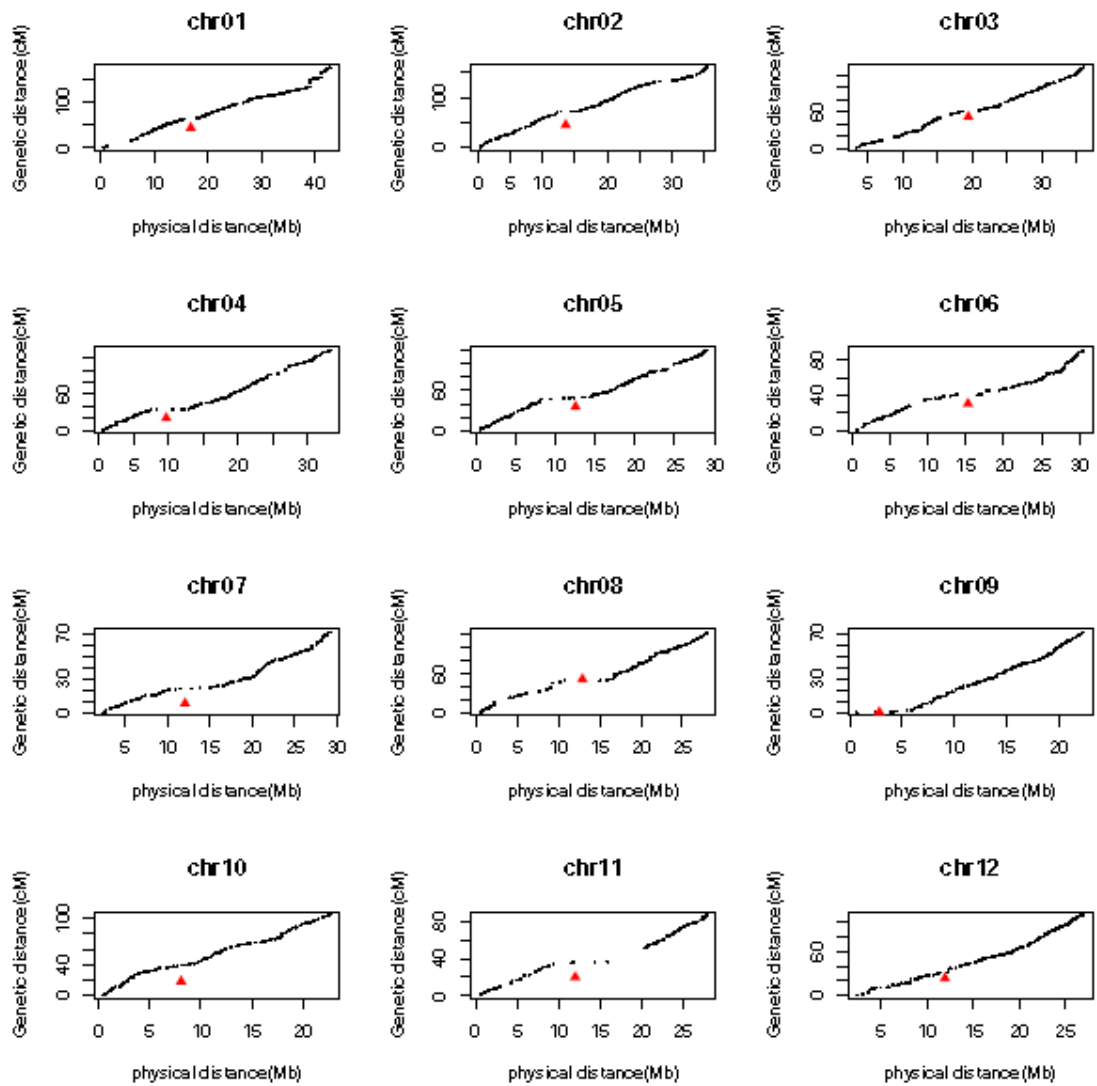

**Supplementary Figure 5** Genetic versus physical distance maps of 12 chromosomes. The genetic distance was calculated depending on physical distance and recombination rate using *Kosambi* function. Red triangles point to the positions of centromere on each chromosome.

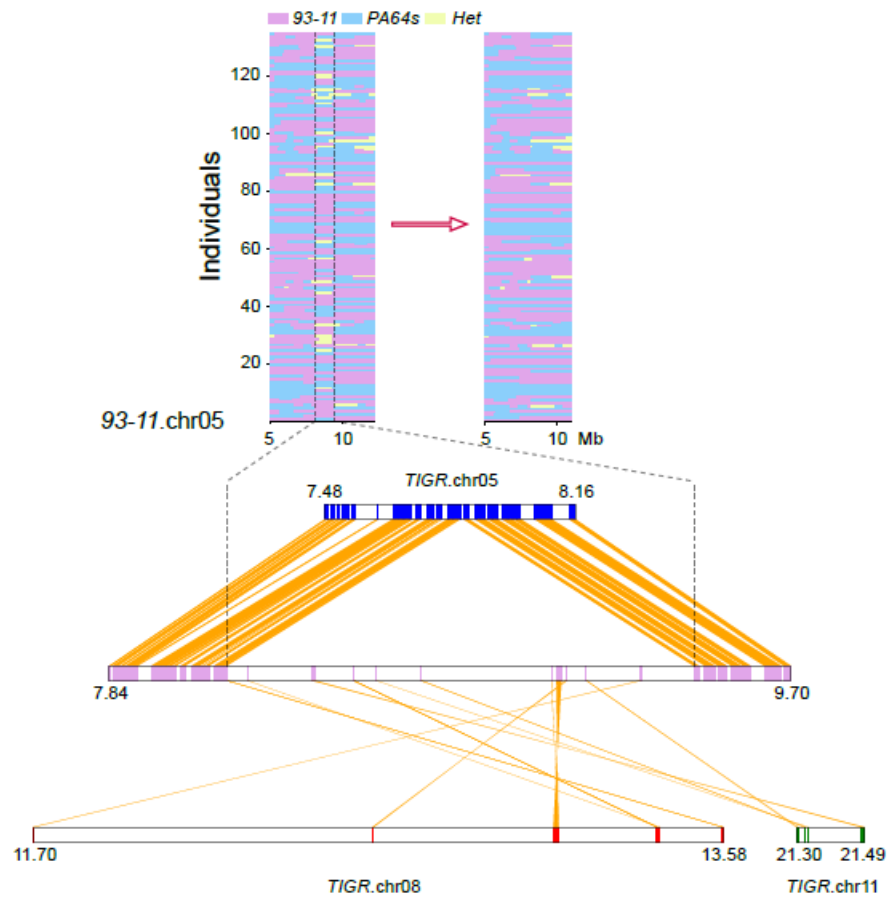

**Supplementary Figure 6** An example of falsely anchored scaffolds revealed by linkage map and syntenic analysis. The region of falsely anchored scaffolds disturbed the normal linkage relationships in the graphic map of genotypes and was not supported by normal syntenic analysis with the reference.

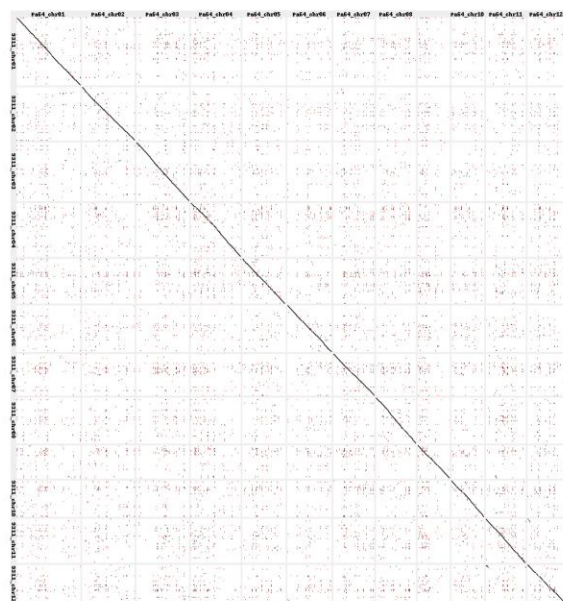

(a)

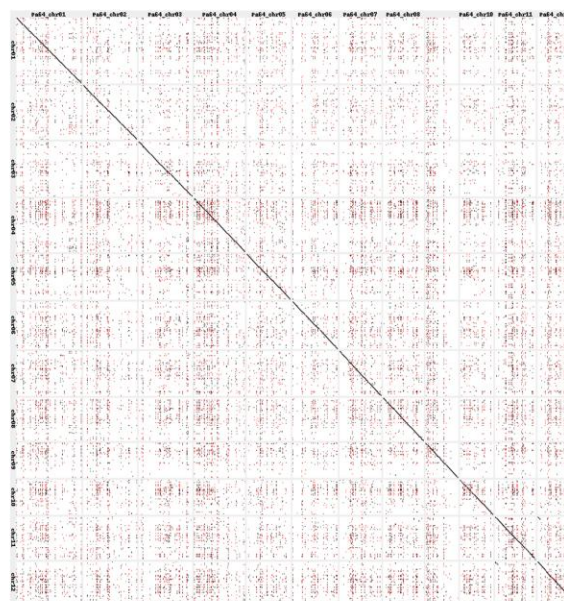

(b)

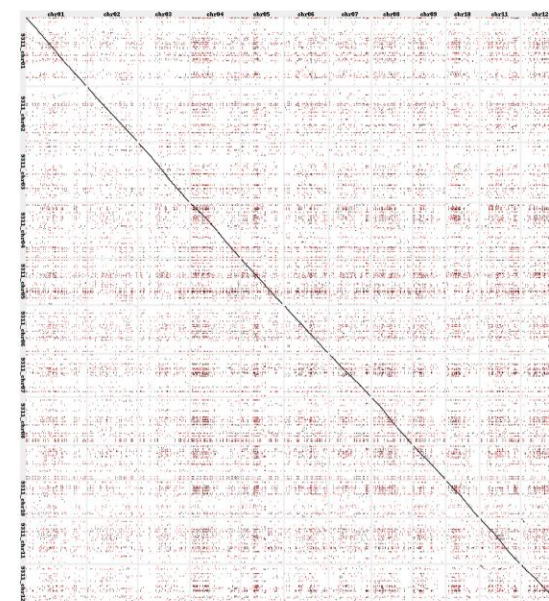

(c)

**Supplementary Figure 7** Synteny analysis among the three genomes: *PA64*, *93-11* and *Nipponbare*: (a) *93-11* vs. *PA64s* (b) *Nipponbare* vs. *PA64s* (c) *93-11* vs. *Nipponbare*.

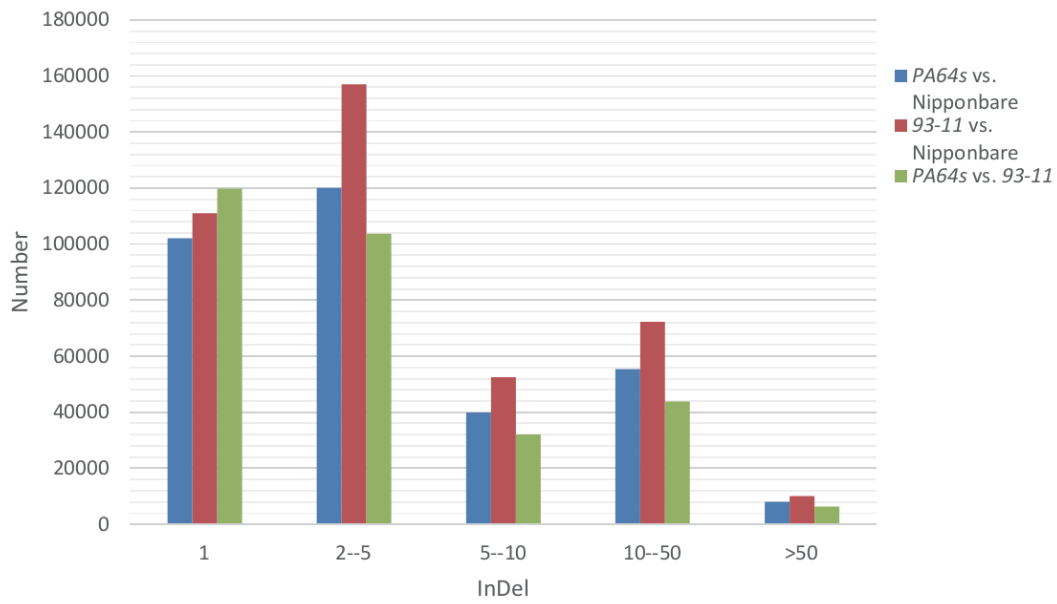

**Supplementary Figure 8** Comparative analysis of InDels among three genomes.

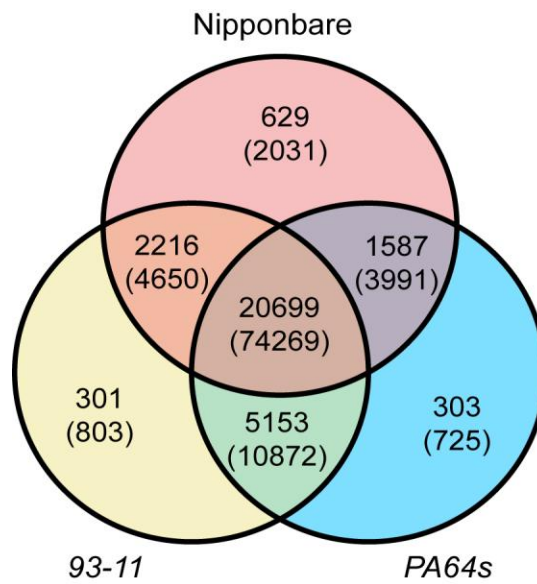

**Supplementary Figure 9** The Venn diagram shows common and unique gene families in *93-11*, *PA64s* and *Nipponbare*. The number of genes belonging to the corresponding families is presented in brackets under the number of families.

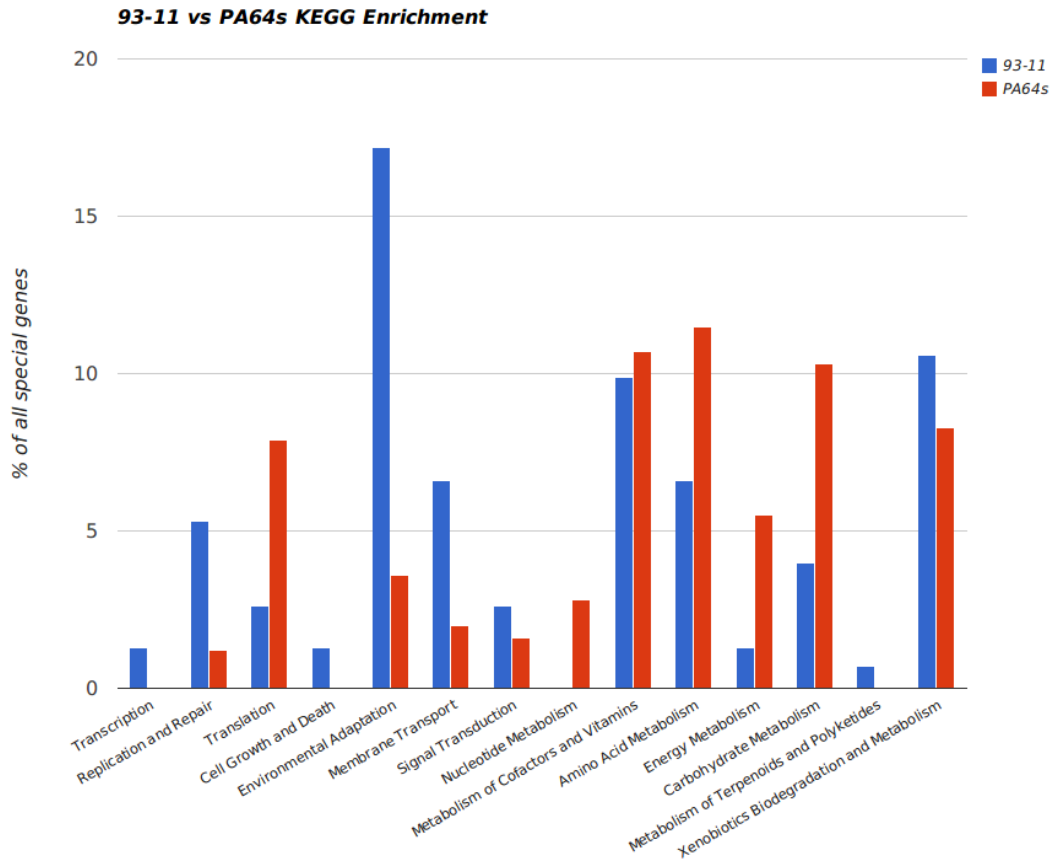

Supplementary Figure 10 KEGG enrichment of special genes in 93-11 and PA64s.

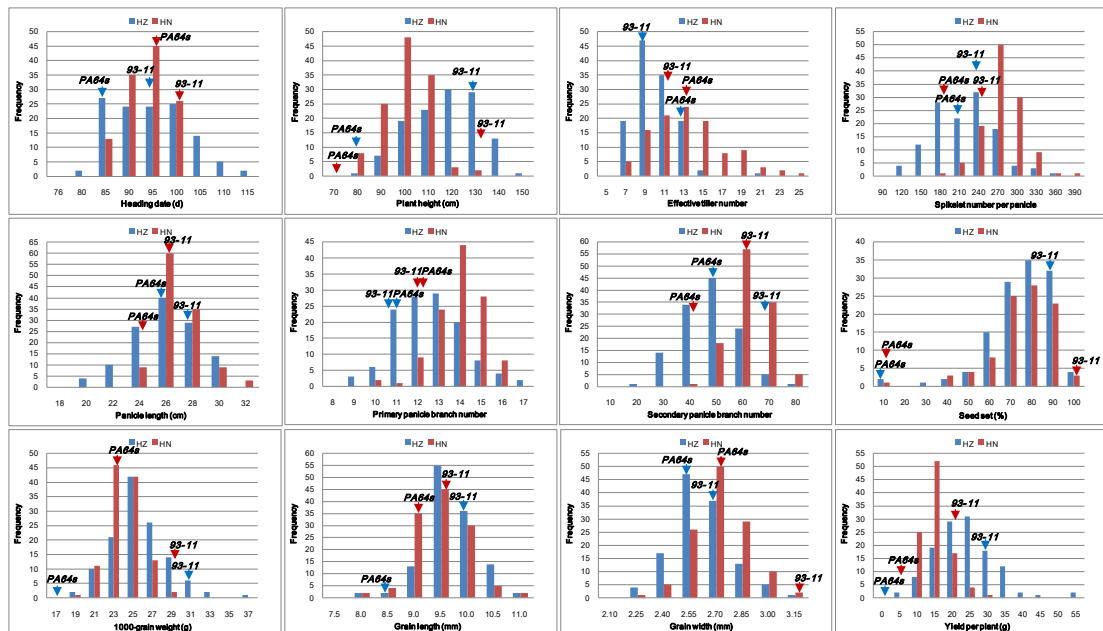

Supplementary Figure 11 Distribution of twelve yield component traits of RIL derived from 93-11 and PA64s in Hangzhou (HZ) and Hainan (HN). Arrow head represents the trait value of 93-11 or PA64s.

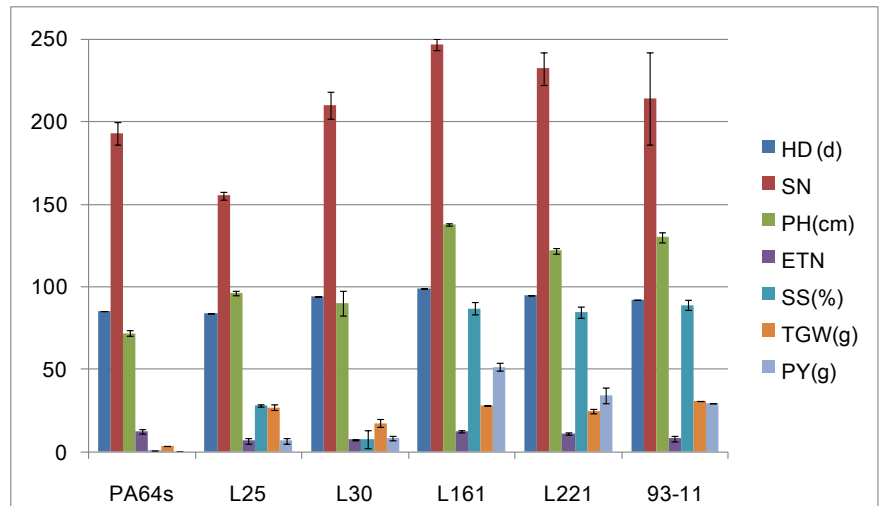

| QTL              | PA64s | L25 | L30 | L161 | L221 | 93-11 | Candidate gene   |
|------------------|-------|-----|-----|------|------|-------|------------------|
| <i>qHD8/qSN8</i> | P     | P   | 9   | 9    | 9    | 9     | <i>DTH8</i>      |
| <i>qPH5</i>      | P     | 9   | P   | 9    | P    | 9     | <i>EUI1</i>      |
| <i>qETN4</i>     | P     | P   | 9   | P    | P    | 9     | <i>HTD1</i>      |
| <i>qSS12</i>     | P     | P   | P   | 9    | 9    | 9     | <i>P/TMS12-1</i> |
| <i>qTGW4</i>     | P     | 9   | P   | 9    | 9    | 9     |                  |

**Supplementary Figure 12** Seven yield-associated traits and five QTL genotypes of four RIL lines and two parents. Abbreviations are indicated as following: heading date (HD), spikelet number per panicle (SN), plant height (PH), effective tiller number (ETN), seed set (SS), 1000-grain weight (TGW), and yield per plant (PY). Bar represents S.D. Five QTLs (*qHD8/qSN8*, *qPH5*, *qETN4*, *qSS12*) cover the loci of cloned candidate genes (*DTH8*, *EUI1*, *HTD1*, *P/TMS12-1*), respectively. P represents *PA64s* genotype and 9 for *93-11* genotype.

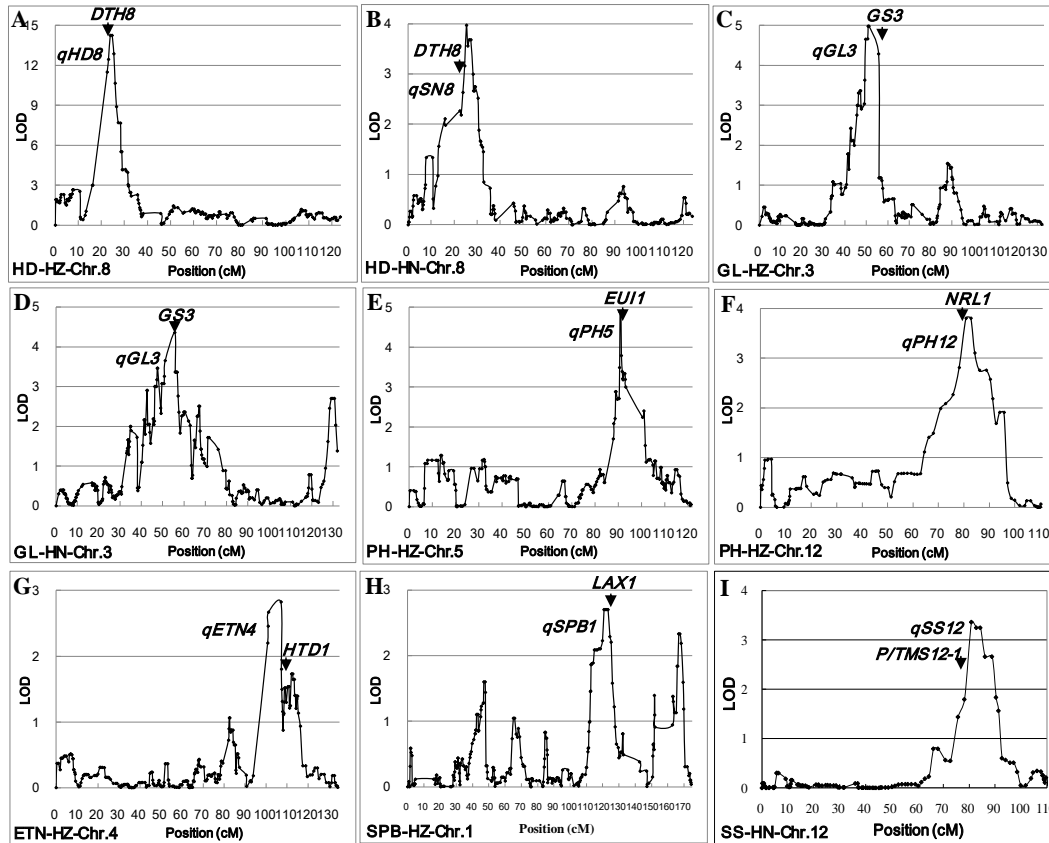

**Supplementary Figure 13** Precise locations of nine QTLs and seven candidate genes. Curves indicate chromosome locations (cM) and LOD values of the detected QTLs. Arrow heads represent the relative genetic positions of candidate genes.

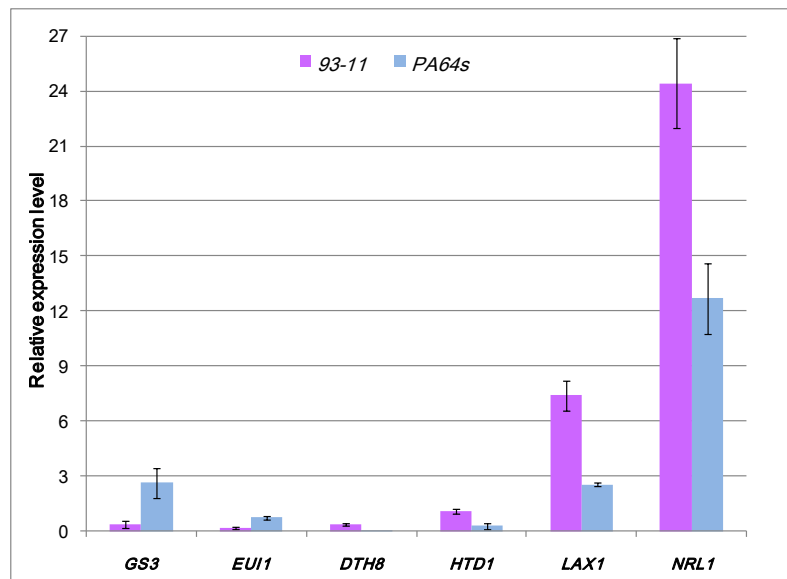

**Supplementary Figure 14** Expression analysis of candidate genes in 93-11 and PA64s. Total RNA was isolated from panicles (for GS3, DTH8, and LAX1) and first internodes (for EU11 and NRL1) in the booting stage, and tiller buds (for HTD1) at the tillering stage. The transcript levels of these genes were normalized against those of *OsACTIN1* gene. Values are the mean  $\pm$  S.D. of three replicates.
